1 **Blocks in tricarboxylic acid cycle of *Salmonella enterica* cause global**  
2 **perturbation of carbon storage, motility and host-pathogen-interaction**

3  
4 Janina Noster<sup>1\*</sup>, Nicole Hansmeier<sup>2</sup>, Marcus Persicke<sup>3</sup>, Tzu-Chiao Chao<sup>4</sup>, Rainer Kurre<sup>5,6</sup>,  
5 Jasmin Popp<sup>1</sup>, Viktoria Liss<sup>1</sup>, Tatjana Reuter<sup>1</sup>, Michael Hensel<sup>1,6\*</sup>

6  
7 <sup>1</sup> Abt. Mikrobiologie, Universität Osnabrück, Osnabrück, Germany; <sup>2</sup> Department of Biology,  
8 Luther College at University of Regina, Regina, Canada; <sup>3</sup> Microbial Genomics and  
9 Biotechnology, Center for Biotechnology, Universität Bielefeld, Bielefeld, Germany; <sup>4</sup> Institute  
10 of Environmental Change & Society, University of Regina, Regina, Canada; <sup>5</sup> iBiOS, <sup>6</sup>  
11 CellNanOs, Universität Osnabrück, Osnabrück, Germany

12  
13 Running title: *Salmonella* patho-metabolism

14 Keywords: TCA cycle, glycogen metabolism, chemotaxis, phagocytosis

15  
16 *Addresses for correspondence:*

17 Janina Noster  
18 Abteilung Mikrobiologie  
19 Fachbereich Biologie/Chemie, Universität Osnabrück  
20 Barbarastr. 11  
21 49076 Osnabrück, Germany  
22 Tel: ++ 49 (0)541 969 2855  
23 Fax: ++ 49 (0)541 969 3942  
24 E-mail: Janina.Noster@biologie.uni-osnabrueck.de  
25 or  
26 Michael Hensel

24.09.2019

*Salmonella* patho-metabolism

27 Abteilung Mikrobiologie  
28 CellNanOs – Center for Cellular NanoAnalytics Osnabrück  
29 Fachbereich Biologie/Chemie, Universität Osnabrück  
30 Barbarastr. 11  
31 49076 Osnabrück, Germany  
32 Tel: ++ 49 (0)541 969 3940  
33 Fax: ++ 49 (0)541 969 3942  
34 E-mail: Michael.Hensel@biologie.uni-osnabrueck.de

35

36

24.09.2019

*Salmonella* patho-metabolism

## 37 **Abstract**

38 The tricarboxylic acid cycle is a central metabolic hub in most cells. Virulence functions of  
39 bacterial pathogens such as facultative intracellular *Salmonella enterica* serovar Typhimurium  
40 (STM) are closely connected to cellular metabolism. During systematic analyses of mutant  
41 strains with defects in TCA cycle, a strain deficient in all fumarase isoforms ( $\Delta$ *fumABC*) elicited  
42 a unique metabolic profile. Alongside fumarate STM  $\Delta$ *fumABC* accumulates intermediates of  
43 glycolysis and pentose phosphate pathway. Analyses by metabolomics and proteomics revealed  
44 that fumarate accumulation redirects carbon fluxes towards glycogen synthesis due to high  
45 (p)ppGpp levels. In addition, we observed reduced abundance of CheY, leading to altered  
46 motility and increased phagocytosis of STM by macrophages. Deletion of glycogen synthase  
47 restored normal carbon fluxes and phagocytosis, and partially levels of CheY. We propose that  
48 utilization of accumulated fumarate as carbon source induces a status similar to exponential to  
49 stationary growth phase transition by switching from preferred carbon sources to fumarate,  
50 which increases (p)ppGpp levels and thereby glycogen synthesis. Thus, we observed a new  
51 form of interplay between metabolism of STM, and cellular functions and virulence.

## 52 **Importance**

53 We performed perturbation analyses of the tricarboxylic acid cycle of the gastrointestinal  
54 pathogen *Salmonella enterica* serovar Typhimurium. The defect of fumarase activity led to  
55 accumulation of fumarate, but also resulted in a global alteration of carbon fluxes, leading to  
56 increased storage of glycogen. Gross alterations were observed in proteome and metabolome  
57 compositions of fumarase-deficient *Salmonella*. In turn, these changes were linked to aberrant  
58 motility patterns of the mutant strain, and resulted in highly increased phagocytic uptake by  
59 macrophages. Our findings indicate that basic cellular functions and specific virulence  
60 functions in *Salmonella* critically depend on the proper function of the primary metabolism.

61

24.09.2019

*Salmonella* patho-metabolism

## 62 **Introduction**

63 The central carbon metabolism (CCM) is essential for all prototrophic bacteria because it  
64 provides energy, as well as precursors for biosynthesis of a large number of biomolecules. In  
65 particular, the tricarboxylic acid cycle (TCA cycle) produces the reductive equivalents for the  
66 electron transport chain and the carbon backbone for various amino acids, making it an  
67 important hub for efficient bacterial metabolism in changing environments (1, 2). Several  
68 endogenous factors, such as the energy status of the cell, influence TCA cycle activity. For  
69 example, the activity of the isocitrate dehydrogenase is allosterically stimulated by ADP (3),  
70 whereas  $\alpha$ -ketoglutarate dehydrogenase is inhibited by its products succinyl-CoA and NADH  
71 (4). In addition, bacterial citrate synthesis is controlled by allosteric inhibition of citrate  
72 synthase by ATP and NADH (5). However, TCA cycle activity is also influenced by exogenous  
73 factors, such as exposure to antibiotics and ROS, which target sensitive enzymes harboring Fe-  
74 S clusters (6, 7).

75 *Salmonella enterica* serovar Typhimurium (STM) is an invasive facultative intracellular  
76 pathogen, the causative agent of human gastroenteritis, and serves as model organism for  
77 systemic *Salmonella* infections. The divergent host niches colonized during infection demand  
78 STM to adapt its metabolism from the intestinal lumen, which is a nutrient-rich environment  
79 with a competing microbiome (8), to severe nutritional restrictions and ROS attacks inside the  
80 so-called *Salmonella*-containing vacuole (SCV) during intracellular life within host cells (9,  
81 10). Its versatile and robust metabolism (11) makes STM an ideal model organism to study the  
82 interconnection of metabolism and virulence functions.

83 To address the role of the TCA cycle in patho-metabolism of STM, we analyzed the effect of  
84 perturbations of the TCA cycle using a set of mutant strains each defective in one enzymatic  
85 step. Our former study indicated that TCA cycle perturbations induced in STM by oxidative  
86 stress result from damage of Fe-S cluster containing enzymes (12). Accordingly, a mutant strain  
87 deficient in all three fumarase isoforms ( $\Delta$ *fumABC*) accumulated high amounts of TCA

24.09.2019

*Salmonella* patho-metabolism

88 intermediate fumarate, but also showed the remarkable phenotype of increased phagocytosis by  
89 murine macrophages. These observations pointed towards a link between TCA cycle metabolite  
90 fumarate and cellular functions of STM.

91 The C<sub>4</sub>-dicarboxylate fumarate recently gained increasing interest due to various links between  
92 metabolisms and bacterial pathogenesis. In EHEC, fumarate is essential for full virulence in a  
93 *Caenorhabditis elegans* infection model where it regulates the expression of a tryptophanase  
94 by the transcription factor Cra (13). In *Mycobacterium tuberculosis*, fumarase deficiency was  
95 shown to be fatal due to protein and metabolite succination (14). Other studies demonstrated  
96 fumarate as factor that increases frequency of persister formation, or modulates motility and  
97 chemotaxis in *E. coli* (15-17).

98 In this work, we conducted metabolomics and proteomics to characterize the metabolic  
99 landscape of STM  $\Delta$ *fumABC*. By this dual-omics approach, we elucidated a new example for  
100 the interplay between metabolism, and cellular functions and virulence in STM.

101

24.09.2019

*Salmonella* patho-metabolism

## 102 **Results**

### 103 *Effects of TCA cycle enzyme deletion on the carbon metabolism of S. Typhimurium*

104 For a global analysis of the effects of perturbations of the TCA cycle on patho-metabolism of  
105 STM, we generated a set of isogenic STM mutant strains, each defective in one reaction of the  
106 TCA cycle. Using this set of strains in comparison to STM WT, we performed metabolomics  
107 analyses of stationary cultures, grown 18.5 h in rich media (LB broth) and analysed samples as  
108 described before (12). Metabolomics revealed that the  $\Delta fumABC$  strain, deficient in all  
109 fumarase isoforms, had a highly aberrant metabolic profile distinct from that of other mutant  
110 strains. Besides a strong accumulation of fumarate (115-fold compared to WT), STM  $\Delta fumABC$   
111 contained significantly increased amounts of glycolysis and PPP intermediates.  
112 Moreover, the  $\Delta fumABC$  strain exhibited increased levels of glucose-6-phosphate (G6P),  
113 fructose-6-phosphate (F6P) and sedoheptulose-7-phosphate (S7P), whereas all other mutant  
114 strains exhibited decreased or unchanged levels compared to WT (**Fig. 1, Table S 1**). This  
115 observation indicates distinct and unique impacts of the fumarase deletions on carbon flux.  
116 Only a mutant strain deficient in succinate dehydrogenase also showed a larger level of F6P,  
117 but not at the same extend as observed for  $\Delta fumABC$ . Furthermore, there was a strong  
118 accumulation of aspartate, likely arising from the large pool of fumarate by the action of  
119 aspartate ammonia-lyase AspA (**Table S 2**).

120 In our previous analyses of ROS-induced damages of TCA cycle enzymes on STM patho-  
121 metabolism, we found that a mutant strain unable to detoxify endogeneously generated ROS  
122 was attenuated in intracellular proliferation. Surprisingly, this mutant strain was internalized by  
123 macrophages at higher rates than STM WT (12). Endogenous ROS cause damage of Fe-S  
124 cluster-containing TCA cycle enzymes, and also a  $\Delta fumABC$  strain was internalized by  
125 macrophages at 15-fold higher rate compared to WT STM, without defects in intracellular  
126 proliferation. These observations point towards a link between the function of the TCA cycle

24.09.2019

*Salmonella* patho-metabolism

127 and virulence properties of STM, which prompted us to characterize the STM  $\Delta$ *fumABC* strain  
128 in detail.

129 *Quantitative proteomics and metabolic profiling reveal alterations in the central carbon*  
130 *metabolism of STM  $\Delta$ fumABC*

131 We first performed proteomic and metabolic profiling of STM WT and  $\Delta$ *fumABC* strains after  
132 culture in rich media (LB broth) for 18.5 h and analyzed samples as described (12). As  
133 anticipated from genotype and fumarate accumulation, fumarases were not detected in the  
134 fumarase-deficient strain. We did not detect changes in other TCA cycle intermediates (**Fig.**  
135 **2**). However, we observed increased amounts of citrate synthase (GltA), aconitase B (AcnB),  
136 isocitrate dehydrogenase and  $\alpha$ -ketoglutarate dehydrogenase component (SucA) by 2.05- to  
137 2.72-fold. With respect to catabolism of hexoses, and in line with higher concentrations of G6P  
138 (2.28-fold) and slight increment of F6P (1.91-fold), increased amounts of the corresponding  
139 enzymes were detected in the  $\Delta$ *fumABC* strain. Glucokinase (Glk), glucose-6-phosphate-  
140 isomerase (Pgi), phosphofructokinase A (PfkA) and phosphoglycerate mutase (GpmB) were  
141 only identified in  $\Delta$ *fumABC*, and we determined 2.27- to 5.42-fold increased amounts of  
142 fructose-1,6-bisphosphatase class 1 (Fbp), fructose-bisphosphate-aldolase B (FbaB),  
143 glyceraldehyde-3-phosphate-dehydrogenase (GapA) and pyruvate kinase I (PykF). The  
144 increased amount of S7P can be correlated with higher amounts of glucose-6-phosphate-  
145 dehydrogenase (Zwf), ribulose-phosphate-3-epimerase (Rpe) and transketolase B (TktB),  
146 detected only in the proteome of  $\Delta$ *fumABC*. Furthermore, transaldolase A (TalA) was increased  
147 3.29-fold.

148 In addition, we observed only in the proteome of STM  $\Delta$ *fumABC* key enzymes of glycogen  
149 biosynthesis, i.e. glycogen synthase (GlgA), glucose-1-phosphate adenylyltransferase (GlgC),  
150 glycogen debranching enzyme (GlgX), trehalose-phosphate-synthase (OtsA), as well as  
151 trehalose-phosphate-phosphatase (OtsB) (**Fig. 2D**). Together with the detected accumulation of

24.09.2019

*Salmonella* patho-metabolism

152 maltose (10-fold) and trehalose (2-fold), these data suggest an increased glycogen accumulation  
153 in STM  $\Delta$ *fumABC* compared to the WT.

154 To test for increased glycogen storage, bacterial cultures grown on LB agar were treated with  
155 potassium iodine for glycogen staining (18). While STM WT was only lightly stained, the  
156 intense brown color of STM  $\Delta$ *fumABC* colonies indicated high accumulation of glycogen (**Fig.**  
157 **3C**). We next applied transmission electron microscopy (TEM) of ultrathin sections of STM  
158 WT (**Fig. 3A**) and  $\Delta$ *fumABC* cells (**Fig. 3B**). Granular aggregates of low electron density were  
159 observed in the polar regions of STM  $\Delta$ *fumABC*, but to a far lesser extent in WT cells.  
160 Accordingly, enzymatic quantification revealed 12-fold increased glycogen content in STM  
161  $\Delta$ *fumABC* compared to WT (**Fig. 3D**). Complementation of STM  $\Delta$ *fumABC* by plasmids  
162 harboring *fumAC* or *fumB* genes restored WT levels of glycogen (**Fig. S 1A**). These data  
163 indicate that fumarate accumulation in STM  $\Delta$ *fumABC* is a key factor for biasing the glycogen  
164 metabolism towards altered carbon fluxes and increased glycogen storage.

165 *Deletion of glycogen synthase GlgA decreases amounts of G6P, F6P and S7P in Salmonella*  
166 *WT and  $\Delta$ fumABC strains*

167 To further investigate the connection of glycogen biosynthesis and fumarate accumulation, we  
168 blocked glycogen synthesis by deletion of *glgA*, which encodes the glycogen synthase, in the  
169  $\Delta$ *fumABC* mutant resulting in the STM  $\Delta$ *fumABC*  $\Delta$ *glgA* double mutant. We verified the loss  
170 of glycogen production in the *glgA*-deficient strain with potassium iodine staining (**Fig. 3C**)  
171 and TEM analyses (**Fig. S 2**) as before and were able to restore the original phenotype by  
172 complementation with a plasmid harboring *glgA* (**Fig. S 1B**).

173 Subsequently, we performed quantitative comparative proteomics and metabolomics of STM  
174  $\Delta$ *fumABC*  $\Delta$ *glgA* and compared the obtained profiles with those of STM  $\Delta$ *fumABC* (**Fig. 4**,  
175 **Table S 1**, **Table S 3**). Deletion of glycogen synthase did not affect amounts of metabolic  
176 enzymes in glycolysis, PPP and TCA cycle, but decreased the abundance of glucose-1-  
177 phosphate adenylyltransferase GlgC, an enzyme catalyzing the synthesis of ADPG. Metabolite



24.09.2019

*Salmonella* patho-metabolism

178 analyses by GC-MS revealed strong decrease of G6P, F6P and S7P if *glgA* is deleted **Fig. 4 E**.  
179 Furthermore, the amount of trehalose was increased by 30%, while amounts of maltose were  
180 100-fold reduced in STM  $\Delta$ *fumABC*  $\Delta$ *glgA*.

181 We conclude that altered fluxes through glycolysis and PPP in a fumarase-deficient strain are  
182 induced by increased glycogen synthesis. Abrogation of storage compound synthesis by *glgA*  
183 knockout normalized metabolite levels, due to modified enzyme activities and regulative  
184 mechanisms, rather than altered protein amounts.

185 *Fumarate-induced stringent response influences Salmonella physiology*

186 The amount of stored glycogen is dependent on the abundance of synthesis enzymes (19), and  
187 glycogen synthesis in STM is mainly mediated by enzymes GlgA and GlgC (20). In *E. coli*, the  
188 main regulators for *glgA* and *glgC* transcription are the alarmones ppGpp and pppGpp (further  
189 referred to as (p)ppGpp) (21), which are induced during nutrient starvation by stringent  
190 response mediators RelA and SpoT. To elucidate whether STM  $\Delta$ *fumABC* has an enhanced  
191 stringent response compared to STM WT, we made use of a dual-color reporter plasmid for  
192 relative quantification of *wraB* (= *wrbA* in *E. coli*) expression, which was recently used to  
193 determine the (p)ppGpp levels in *E. coli* (22). We introduced the P<sub>*wraB*</sub>::sfGFP reporter plasmid  
194 into STM WT,  $\Delta$ *fumABC*,  $\Delta$ *fumABC*  $\Delta$ *glgA*, and as negative control into STM  $\Delta$ *relA*  $\Delta$ *spoT*, a  
195 mutant strain deficient in (p)ppGpp synthesis (23), and analyzed the expression by flow  
196 cytometry (**Fig. 5**). To test reporter performance, stationary LB broth cultures of STM WT were  
197 sub-cultured in defined PCN minimal media with or without supplementation by casamino acids  
198 (**Fig. 5A**). Indeed, WT grown without additional source of amino acids showed a higher sfGFP  
199 signal intensity compared to STM WT grown with amino acid supplementation, indicating  
200 higher (p)ppGpp levels.

201 Next, we determined sfGFP signal intensities of STM WT,  $\Delta$ *fumABC* and  $\Delta$ *fumABC*  $\Delta$ *glgA*  
202 harboring the respective reporter plasmid cultured in LB broth for 18.5 h as described before.  
203 Quantification of sfGFP intensity revealed higher values for STM  $\Delta$ *fumABC* and  $\Delta$ *fumABC*

24.09.2019

*Salmonella* patho-metabolism

204  $\Delta glgA$  compared to STM WT, whereas the negative control STM  $\Delta relA \Delta spoT$  exhibited the  
205 lowest signal intensities (**Fig. 5BC**). Additionally, transcript levels of  $glgA$  and  $glgC$  were  
206 determined (**Fig. 5D**). Strongly enhanced expression of  $glgA$  and  $glgC$  was detected for  
207  $\Delta fumABC$  compared to WT. For STM  $\Delta fumABC \Delta glgA$ , we only detected background signals  
208 for  $glgA$ , but still highly increased expression levels of  $glgC$  compared to WT. In addition,  
209 glycogen accumulation in STM  $\Delta fumABC$  was eliminated by further deletion of  $relA$  and  $spoT$   
210 (**Fig. S 3**). Thus, we propose that  $\Delta fumABC$  enforces glycogen synthesis as consequence of an  
211 early and strong stringent response, leading to high (p)ppGpp levels, which in turn raises the  
212 transcript and protein levels of GlgA and GlgC.

213 *Altered amounts of chemotaxis proteins in fumarase-deficient STM lead to increased CCW*  
214 *flagella rotation*

215 Accumulation of (p)ppGpp can negatively affect motility, as recently described for *E. coli* (24).  
216 To explore this potential link, we analyzed proteomic data for modulation of chemotaxis and  
217 motility-related proteins (**Fig. 6A**). Decreased amounts of methyl-accepting chemotaxis  
218 proteins (MCP) and increased abundance of CheY, CheZ and CheW (2.14- 3.86-fold) were  
219 detected in STM  $\Delta fumABC$  compared to WT. In addition, CheB was only found in STM  
220  $\Delta fumABC$ . For STM  $\Delta fumABC \Delta glgA$ , a restoration of chemotaxis protein levels was detected  
221 for CheY. However, CheY abundance was still lower compared to STM WT (**Fig. 6B**).  
222 The amount of CheY influences the number of switching events of flagella rotation direction  
223 (25). Thus, STM  $\Delta fumABC$  might show an altered swimming behavior and we analyzed swim  
224 patterns of bacteria grown over night in rich medium (**Fig. 7A**). Counterclockwise (CCW)  
225 flagella rotation bundles flagella and results in straight swimming, while clockwise (CW)  
226 rotation leads to tumbling (26). STM WT showed short swimming paths alternating with  
227 tumbling, whereas STM  $\Delta fumABC$  exhibited highly prolonged swimming paths and reduced  
228 tumbling events. Furthermore, the number of motile bacteria was higher compared to WT. The  
229 motility patterns of  $\Delta fumABC$  and  $\Delta fumABC \Delta glgA$  were similar.

24.09.2019

*Salmonella* patho-metabolism

230 To further analyze flagella switching from CCW to CW rotation, we performed flagella rotation  
231 analyses of STM WT,  $\Delta$ *fumABC* and  $\Delta$ *fumABC*  $\Delta$ *glgA* grown in rich medium by microscopic  
232 inspection of single bacterial cells fixed by one flagellum to a polystyrene-coated coverslip (27)  
233 (**Fig. 7BC**). We observed a statistically significant increase of CCW flagella rotation for STM  
234  $\Delta$ *fumABC*. Whereas STM WT had an average proportion of CCW rotation of 33%, the  
235  $\Delta$ *fumABC* strain spent 78% of time in CCW flagella rotation. Although STM  $\Delta$ *fumABC*  $\Delta$ *glgA*  
236 exhibited partly normalized amounts of the chemotaxis protein CheY, there was still an  
237 increased proportion of CCW flagella rotation comparable to that of STM  $\Delta$ *fumABC*.  
238 Furthermore, the swimming behavior was not altered by *glgA* deletion, indicating that the  
239 amount of CheY necessary for normalization of switching events was not achieved in STM  
240  $\Delta$ *fumABC*  $\Delta$ *glgA*.

241 Thus, we conclude that fumarase deletion in STM leads to a down-regulation of chemotaxis  
242 proteins and by this to enhanced CCW flagella rotation.

243 *The increased phagocytic uptake of fumarase-deficient STM is due to enhanced CCW flagella*  
244 *rotation and partially depends on glycogen synthesis*

245 Since bacterial motility can increase uptake of pathogenic bacteria by host cells (28-31), we  
246 hypothesized that the observed enhanced uptake of *fumABC* mutant strains by RAW264.7  
247 macrophages (12) could be caused by increased CCW flagella rotation. To test this hypothesis,  
248 we introduced additional deletion of chemotaxis genes *cheY* or *cheZ* in the mutant strain.  
249 Whereas *cheY* deletion strains are locked in CCW flagella rotation,  $\Delta$ *cheZ* mutant strains are  
250 mainly locked in the CW state (32). The combination of  $\Delta$ *cheY* and  $\Delta$ *fumABC* did not alter  
251 phagocytic uptake, while the combination of  $\Delta$ *cheZ* and  $\Delta$ *fumABC* showed uptake only 3.15-  
252 fold higher than WT (**Fig. 8**).

253 Deletion of glycogen synthase partially normalized CheY levels, but not the duration of CCW  
254 flagella rotation in STM  $\Delta$ *fumABC*. Thus, we expected an increased phagocytic uptake of the  
255  $\Delta$ *fumABC*  $\Delta$ *glgA* double mutant as well. However, phagocytosis of STM  $\Delta$ *fumABC*  $\Delta$ *glgA* was

24.09.2019

*Salmonella* patho-metabolism

256 6.9-fold increased compared to WT, but significantly lower than uptake of STM  $\Delta$ *fumABC*  
257 (**Fig. 8B**). Complementation by plasmid-borne *glgA* again increased levels of phagocytosis  
258 (**Fig. S 4**). The *cheY* deletion did not change phagocytic uptake of STM  $\Delta$ *fumABC*  $\Delta$ *glgA*, while  
259 phagocytosis of STM  $\Delta$ *fumABC*  $\Delta$ *glgA*  $\Delta$ *cheZ* was reduced (**Fig. 8**). These results demonstrate  
260 that high phagocytosis of fumarase deletion strains is due to CCW bias of flagella rotation and  
261 is partially dependent on glycogen synthesis.

262 In order to elucidate which factors reduce the phagocytic uptake of STM  $\Delta$ *fumABC*  $\Delta$ *glgA*  
263 compared to  $\Delta$ *fumABC*, we analyzed further characteristics of swimming behavior of both  
264 mutant strains. The frequency of switching events within 1,000 frames (17.71 s) was  
265 determined and a switching event occurred if the flagella rotation direction changed from CW  
266 to CCW or *vice versa* (**Fig. S 5**). Compared to WT (median = 31 events), the switching rate was  
267 reduced in STM  $\Delta$ *fumABC* (median = 20 events), but not in a significant manner (**Fig. 9A**).  
268 Even stronger reduction of switching events was determined for STM  $\Delta$ *fumABC*  $\Delta$ *glgA* (median  
269 = 10 events). Additionally the number of pauses, defined as rotation of the bacterial body of  
270 less than 5°/frame, was analyzed (**Fig. 9B**). Comparable to the number of switching events, WT  
271 had the highest number of pauses (median = 170.5), followed by STM  $\Delta$ *fumABC* (151.5), but  
272 again there is no statistical significant difference between these two strains. A stronger  
273 reduction was observed for STM  $\Delta$ *fumABC*  $\Delta$ *glgA*; here the number of pauses within 1,000  
274 frames was reduced to 89.

275 In conclusion, STM  $\Delta$ *fumABC* showed strongly increased CCW bias and less switching events  
276 than STM WT. These factors influence the interaction with host cells, such as increasing  
277 phagocytic uptake by macrophages. Further deletion of *glgA* in the  $\Delta$ *fumABC* strain did not  
278 reduce time spent in CCW flagella rotation, but decreased the number of switching events,  
279 resulting in reduced phagocytic uptake.

280

24.09.2019

*Salmonella* patho-metabolism

## 281 **Discussion**

282 Our work investigated the effect of perturbation of the TCA cycle of STM on basic cellular  
283 functions and patho-metabolism. By deploying proteomics and metabolomics, we determined  
284 that defects in fumarases biased carbon fluxes towards enhanced glycogen synthesis, likely due  
285 to elevated (p)ppGpp levels in the mutant strain. Furthermore, proteomics revealed reduced  
286 abundances of chemotaxis proteins in STM  $\Delta$ *fumABC*. Analysis of flagella rotation and swim  
287 patterns showed increased CCW bias, raising the contact frequency of STM and host cells, thus  
288 leading to enhanced phagocytic uptake by macrophages. Deletion of glycogen synthase GlgA  
289 relieved the metabolic perturbations, but not the aberrant motility phenotype. However,  
290 phagocytic uptake was decreased. These findings are in line with a previous study that analyzed  
291 the impact of deletions of TCA cycle enzymes harboring Fe-S clusters on patho-metabolism of  
292 STM (12). For  $\Delta$ *fumABC*, we measured increased abundance of glycolysis and PPP  
293 metabolites, and an elevated phagocytic uptake by RAW264.7 macrophages.

294 Our metabolomics data demonstrated higher accumulation of G6P, F6P and S7P for STM  
295  $\Delta$ *fumABC* compared to WT, and deletion of glycogen synthase again normalized the metabolic  
296 flux through glycolysis and PPP (**Fig. 4**). Thus, the increased concentrations of these  
297 metabolites were caused by enhanced glycogen synthesis in STM  $\Delta$ *fumABC* due to changes in  
298 carbon fluxes. Accumulation of the respective metabolites was also observed for *E. coli* with  
299 truncated CsrA, the main component of the carbon storage system (33, 34). As *csrA* deletion  
300 strains accumulate high amounts of glycogen as well, our results indicate that the observations  
301 obtained for *E. coli*  $\Delta$ *csrA* are also consequence of the massive remodeling of the carbon  
302 metabolism due to enhanced glycogen synthesis. However, a role of CsrA was not only reported  
303 in context of post-transcriptional regulation of carbon metabolism, and in particular glycogen  
304 metabolism, but also for chemotaxis proteins, flagella subunits and proteins involved in  
305 virulence functions (35, 36). Thus, the involvement of CsrA as inducer of phenotypes of STM  
306  $\Delta$ *fumABC* is conceivable. While glycogen accumulation indicates very low levels of CsrA,

24.09.2019

*Salmonella* patho-metabolism

307 mutant strains with truncated CsrA showed increased levels of Pgm and reduced levels of  
308 especially PfkA in *E. coli* (33), observations which are contradictory to our results. However,  
309 most studies on *csrA* mutant strains were performed with bacteria grown in minimal media, or  
310 at early growth phases (33). Thus, we cannot exclude a role of CsrA in the enhancement of  
311 glycogen synthesis for STM  $\Delta$ *fumABC*, yet we do not expect CsrA to be sole regulating factor.  
312 In contrast, (p)ppGpp was shown to be the most important factor influencing glycogen  
313 synthesis, at least in *E. coli* (37). (p)ppGpp is known to enhance the expression of *glgA* and  
314 *glgC*, but not *glgB* during stringent response (19). Indeed, we detected GlgA and GlgC only in  
315 STM  $\Delta$ *fumABC* (**Fig. 2D**). Using a dual-color reporter system with  $P_{wrbA}$  controlling sfGFP  
316 expression, we detected increased fluorescence intensities for STM  $\Delta$ *fumABC* and  $\Delta$ *fumABC*  
317  $\Delta$ *glgA* compared to WT. The promoter of *wrbA* was used in several studies for the indirect  
318 quantification of (p)ppGpp (22, 38). Furthermore, by proteomic analyses we detected increased  
319 abundances of WrbA in  $\Delta$ *fumABC* (3.78-fold, see Table S2), supporting our results obtained by  
320 flow cytometry. Taken together, we hypothesize that a fumarase deletion strain increases *glgA*  
321 and *glgC* expression in a (p)ppGpp-dependent manner.

322 The main inducing factors for (p)ppGpp synthesis by RelA and SpoT are amino acid and carbon  
323 source limitations (39). Using LB broth, amino acid limitations are unlikely at early growth  
324 phase. Several studies showed that increase of (p)ppGpp levels can be induced by diauxic shifts,  
325 for example from glucose to succinate (40). Considering the high accumulation of fumarate,  
326 the use of the TCA cycle intermediate as carbon source is conceivable. An indicator for this  
327 model is the slightly increased abundance of aspartase AspA in STM  $\Delta$ *fumABC* (1.5-fold),  
328 catalyzing the reversible reaction from fumarate and ammonia to aspartate (41). Indeed,  
329 metabolomic data showed a 10-fold higher amount of aspartate in the mutant strain, which  
330 serves as substrate for a range of metabolic pathways (42). Furthermore, two studies indicated  
331 that high fumarate accumulation led to use of fumarate as alternative electron acceptor, despite  
332 presence of oxygen (15, 43). However, our proteomic data gave no hints for fumarate

24.09.2019

*Salmonella* patho-metabolism

333 respiration (i.e. fumarate reductase FrdABCD) in the mutant strain, but rather indicated  
334 utilization of fumarate as carbon source. Fumarate metabolism possibly leads to a physiological  
335 situation similar to exponential to stationary phase transition, and therefore increased (p)ppGpp  
336 levels, as discussed for *E. coli* (15, 22).

337 Absence of fumarases led to enhanced CCW flagella rotation, prolonged phase of running  
338 movement, resulting in increased uptake by RAW264.7 macrophages (**Fig. 8**). The impact of  
339 CCW flagella rotation during the infection process was discussed in several prior publications  
340 (28-30). In these studies, CCW flagella rotation and the resulting smooth swimming phenotype  
341 were linked to enhanced frequencies of bacterial contact with host cells, prolonged duration of  
342 adhesion, and increased numbers of phagocytic uptake events. Further deletion of *glgA* in STM  
343  $\Delta$ *fumABC* partly restored CheY levels and we observed reduced uptake of STM  $\Delta$ *fumABC*  
344  $\Delta$ *glgA* by macrophages. As we determined a strongly decreased number of switching events for  
345 the *glgA*-deficient strain, but high frequency of phases of CCW flagella rotation, the logical  
346 consequence is that duration of phases of CW flagella rotation after switching events are longer  
347 for STM  $\Delta$ *fumABC*  $\Delta$ *glgA* than for  $\Delta$ *fumABC*. This effect might be accompanied by the reduced  
348 number of pause events observed for STM  $\Delta$ *fumABC*  $\Delta$ *glgA* in comparison to  $\Delta$ *fumABC* and  
349 WT and could lead to changes in frequency or duration of contacts between STM and host cells.

350 To conclude, our results demonstrate that accumulation of fumarate due to fumarase deletion  
351 leads to induction of glycogen synthesis by enhanced (p)ppGpp concentrations (**Fig. 10**). This  
352 might be triggered by utilization of fumarate as carbon source, causing a exponential to  
353 stationary phase transition-like physiological state during early stationary growth phase.

354 Additionally, we revealed that the increased phagocytic uptake of the fumarase deletion strain  
355 is caused by enhanced CCW flagella rotation, which is the consequence of reduced CheY  
356 abundance. Further deletion of *glgA* normalized metabolic fluxes and restored abundance of the  
357 chemotaxis protein in part, but did not change CCW bias of flagella rotation. However, *glgA*  
358 deletion led to reduced phagocytic uptake by RAW264.7 macrophages, possibly due to



24.09.2019

*Salmonella* patho-metabolism

359 prolonged periods of CW flagella rotation. Our work demonstrates that perturbations of the  
360 carbon fluxes in the TCA cycle lead to dramatic changes in STM physiology and affect the  
361 interaction of this pathogen with host cells.

362

363 *Acknowledgements*

364 This work was supported by grants of the DFG to MH. We thank Karsten Tedin for the STM  
365  $\Delta relA/\Delta spoT$  deletion strains and helpful discussions about (p)ppGpp regulation and Jürgen  
366 Heinisch (Div. Genetics) for support with qPCR.

367

368 *Conflict of interest statement*

369 The author declare no conflicts of interest.

370



24.09.2019

*Salmonella* patho-metabolism

## 371 **Materials and Methods**

### 372 *Bacterial strains*

373 *Salmonella enterica* serovar Typhimurium NCTC 12023 was used as wild-type strain (WT),  
374 and isogenic mutant strains were constructed by  $\lambda$  Red-mediated mutagenesis (see **Table 1**)  
375 (44). Primers and plasmids required for mutagenesis, removal of resistance cassettes and check  
376 for the correct insertion are listed in **Table 2** and **Table S 4A**. Transfer of mutant alleles into  
377 fresh strain background or for combination with other mutations occurred via P22 transduction.  
378 Both methods are described in J. Popp, et al. (45).

### 379 *Construction of plasmids*

380 For generation of p3752 and p3756, wild-type promoters and coding sequences of *fumAC* and  
381 *fumB* were amplified with primers listed in .. After digest with NotI and XhoI or ApaI and XhoI,  
382 respectively, the gene products were ligated into the low copy plasmid pWSK30 and  
383 transformed in *E. coli* DH5 $\alpha$ . Positive clones were confirmed with primers listed in **Table S**  
384 **4A**. The plasmids were isolated and transformed in the  $\Delta$ *fumAC* or  $\Delta$ *fumB* deletion strain.  
385 For construction of p4763 the promoter and sequence of *glgBXCAP* as well as the vector  
386 pWSK29 were amplified by PCR using primers listed in **Table S 4B**. The obtained PCR  
387 fragments were assembled by Gibson assembly according to the manufacturer's protocol  
388 (NEB). Sequence-confirmed plasmids were transformed in the  $\Delta$ *fumABC*  $\Delta$ *glgA* deletion strain.  
389 Generation of the reporter plasmid p5330 was performed as described previously (46). Briefly,  
390 plasmid p4889 ( $P_{EM7}::$ DsRed  $P_{uhpT}::$ sfGFP) was used as vector. The *uhpT* promoter was  
391 replaced by the promoter fragment of *wraB* by Gibson assembly of fragments generated by  
392 PCR. Primers for fragment generation are listed in **Table S 4C**. Sequence-confirmed plasmids  
393 were transformed in STM WT,  $\Delta$ *fumABC*,  $\Delta$ *fumABC*  $\Delta$ *glgA* and  $\Delta$ *relA*  $\Delta$ *spoT*.

### 394 *GC-MS sample preparation and measurement*

24.09.2019

*Salmonella* patho-metabolism

395 Culture of strains and cell harvest occurred as described in Noster *et al.* (2019). In short: Each  
396 strain was cultured for 18.5 h at 37 °C in 25 ml LB broth with agitation at 180 rpm. For  
397 measurements of metabolites in bacterial cells, 5 ml of cultures were transferred onto Durapore  
398 PVDF filter membranes (Merck, Darmstadt, Germany) with a pore size of 0.45 µm by suction.  
399 After washing with PBS, cells were scraped from the filter into 1 ml of fresh PBS, pelleted and  
400 shock-frozen in liquid nitrogen. Afterwards samples were freeze-dried and their dry weights  
401 were determined. Metabolome analysis of the TCA cycle mutant strains was performed by GC-  
402 MS using protocols according to J. Plassmeier, et al. (47) and Noster *et al.* (2019). In short: For  
403 metabolite extraction 1 ml 80% methanol containing 10 µM ribitol (RI, internal standard) were  
404 added to dried samples and for cell disruption 500 mg acid-washed glass beads (Sigma-Aldrich,  
405 USA) and a homogenizer (Precellys, Peqlab) were used. After centrifugation, supernatants were  
406 evaporated in a nitrogen stream. For derivatization, 50 µl of a 20 mg/ml of methoxylamine  
407 hydrochloride in pyridine and N-methyl-N-[trimethylsilyl]-trifluoroacetamide were added  
408 successively to each sample and incubated with constant stirring at 37 °C for 90 min. or 30  
409 min., respectively. RI standard was added and incubated for further 5 min. Samples were  
410 centrifuged and supernatants were used for GC-MS measurement using a TraceGC gas  
411 chromatograph equipped with a PolarisQ ion trap and an AS1000 autosampler (Thermo  
412 Finnigan, Dreieich, Germany) according to Plassmeier *et al.* (47). Metabolite quantities were  
413 normalized to ribitol and dry weights of various samples as described in Plassmeier *et al.* Mean  
414 relative pool size changes of the mutant strains compared to WT were calculated and only those  
415 data with an error probability (Student's *t*-test) of less than 0.05 were used for further  
416 interpretation.

#### 417 *Proteome profiling by LC-MS measurement*

418 Bacteria were cultured as described for the metabolite profiling. Sample preparation and LC-  
419 MS measurement were performed according to Noster *et al.* (2019). In short, cells from 50 ml  
420 o/n culture were pelleted, suspended and washed twice with PBS. Pelleted bacteria were

24.09.2019

*Salmonella* patho-metabolism

421 resuspended in lysis buffer (50 mM Tris pH 8.5, 1% SDS, protease inhibitor). Cell disruption  
422 occurred with zirconia/silica beads and a cell homogenizer. Cell debris were removed by  
423 centrifugation and proteins precipitated with TCA. Protein pellets were washed with acetone,  
424 dried and used for the following sample preparation, proteomic digest and LC-MS-  
425 measurement as described in Noster *et al.* (2019).

#### 426 *Gentamicin protection assay*

427 Culture and infection of RAW264.7 macrophages were performed as described J. Popp, et al.  
428 (45). Briefly, RAW264.7 macrophages were infected with STM o/n cultures at an MOI of 1  
429 and centrifuged 5 min. at 370 x g. The infection proceeded further 25 min. Cells were washed  
430 thrice with PBS and extracellular, non-phagocytosed bacteria were killed by incubation with  
431 medium containing gentamicin (100 µg/ml for hour 1, 10 µg/ml for hour 2). 2 h p.i. cells were  
432 washed thrice with PBS and lysed by addition of 0.1% Triton-X-100 in PBS. Serial dilutions  
433 of the inoculum and lysates were plated on Mueller-Hinton II agar plates and incubated o/n at  
434 37 °C. Phagocytosis rates were determined as percentage of internalized bacteria in dependence  
435 to the inoculum.

#### 436 *Qualitative and quantitative determination of glycogen content*

437 Qualitative determination of glycogen contents of bacterial cultures occurred as described by  
438 S. Govons, *et al.* (18). Bacterial cultures were streaked on LB agar plates and incubated o/n at  
439 37 °C. 10 ml Lugol's iodine solution (Roth) were added to the plate and incubated 1 min. at  
440 RT. The iodine solution was discarded and the plates photographed immediately.

441 Quantification of glycogen contents occurred following the protocol by N. K. Thomas Fung,  
442 Timo van der Zwan, Michael Wu (48). Of each strain, cells of 5 ml o/n culture were pelleted  
443 by centrifugation (13,000 x g, 10 min., 4 °C), resuspended in 50 mM TAE buffer and pelleted  
444 again. Cells were resuspended in 1.25 ml sodium acetate buffer (200 mM, pH 4.6), the  
445 suspension was added to 500 mg glass beads and disrupted by three cycles, each 1 min. with

24.09.2019

*Salmonella* patho-metabolism

446 maximal speed, using Vortex Genie 2, equipped with an attachment for microtubes (scientific  
447 industries). After centrifugation, supernatants were incubated for 20 min. at 80 °C for  
448 denaturation of endogenous enzymes. For each strain 60 µl lysate were incubated with 6 µl  
449 amyloglucosidase (200 U/ml, Sigma-Aldrich) (quantification of glucose stored as glycogen and  
450 free glucose) or 6 µl water (quantification of free glucose), respectively. After incubation for  
451 30 min. at 50 °C, 50 µl of each sample were transferred into a 96 well-plate in technical  
452 duplicates. 250 µl HK reagent (Sigma-Aldrich) were added to each sample and OD<sub>340</sub> was  
453 determined in 10 min. intervals for 1 h. A standard curve with different dilutions of a glucose  
454 solution was used for extrapolation of the determined data. For relative quantification of the  
455 glycogen amount, maximal values obtained for free glucose were subtracted from maximal  
456 values obtained from free glucose and glycogen and normalized to the OD<sub>600</sub> of the bacterial  
457 culture.

#### 458 *TEM analysis*

459 For TEM analyses of bacteria, STM was grown o/n at 37 °C in LB broth with aeration. Cells  
460 were harvested for 2 min. at 1,250 x g. The pellet was resuspended in buffer (0.2 M HEPES,  
461 pH 7.4, 5 mM CaCl<sub>2</sub>) and bacteria were fixed by addition of glutaraldehyde (Electron  
462 Microscopy Sciences) in buffer to a final concentration of 2.5% for 1 h at 37 °C. After fixation,  
463 bacteria were washed several times in buffer and harvested for 5 min. at 625 x g. The pellet was  
464 gently resuspended in liquid 2% LMP agarose prewarmed to 37 °C in buffer and incubated for  
465 10 min. at 37 °C. Bacteria in agarose were repelleted for 1 min. at 1,250 x g and cooled down  
466 to 4 °C until agarose was solid. The agarose block containing the bacteria was cut into small  
467 cubes (max. 1 mm<sup>3</sup>) and cubes were post-fixed was performed with 2% osmium tetroxide  
468 (Electron Microscopy Sciences) in buffer containing 1.5% potassium ferricyanide (Sigma) and  
469 0.1% ruthenium red (Applichem) for 1.5 h at 4 °C in the dark. After several washing steps,  
470 bacteria were dehydrated in a cold graded ethanol series and finally rinsed in anhydrous ethanol  
471 at RT twice. The agarose cubes were flat-embedded in EPON812 (Serva). Serial 70 nm sections

24.09.2019

*Salmonella* patho-metabolism

472 were generated with an ultramicrotome (Leica EM UC6) and collected on formvar-coated EM  
473 copper grids. After staining with uranyl acetate and lead citrate, bacteria were observed with  
474 TEM (Zeiss EFTEM 902 A), operated at 80 kV and equipped with a 2K wide-angle slow-scan  
475 CCD camera (TRS, Moorenwies, Germany). Images were taken with the software ImageSP  
476 (TRS image SysProg, Moorenwies, Germany).

#### 477 *Flagella rotation analysis*

478 Flagella rotation was determined as illustrated in **Fig. S 5**. Bacteria were cultured for 18.5 h in  
479 LB, diluted 1:100 in PBS and subjected to shear force by pressing the suspension eight times  
480 through a syringe equipped with a 24 G cannula. 15  $\mu$ l sample were placed onto a microscope  
481 slide and covered with a polystyrene-coated coverslip, on which three small drops of vacuum  
482 grease were spotted to achieve an optimal distance allowing free movement of STM. Sealing  
483 the cover slip with a 1:1:1 mixture of vaseline, lanoline and paraffin avoided suction. Rotating  
484 cells, bound with their flagella filaments to the coverslip, were selected and rotation direction  
485 was recorded using the Axio Observer microscope with an AxioCam CCD camera (Zeiss) for  
486 periods of 18 s (frame rate 57/s). After image processing with Fiji (size reduction, background  
487 subtraction, contrast enhancement, smoothing with the GaussianBlur plug-in filter), rotation  
488 analyses were performed using the tool SpinningBug Tracker (user-written software, Matlab  
489 7.17 (R2012a)). By detection of the angle between the rotating bacteria and a reference axis,  
490 the rotation direction was calculated. CCW rotation of the bacterial body has to be interpreted  
491 as CW rotation of the flagellum and *vice versa*. Rotations of less than 5° per frame were defined  
492 as pause. Bacteria rotating with speeds of > 180°/frame were excluded, due to limited time-  
493 resolution. Switching events were defined as changes from CW to CCW rotation and *vice versa*.

#### 494 *Swimming path analysis*

495 Bacteria were cultured 18.5 h with aeration in LB and diluted 1:20 in PBS. The assembly of  
496 microcopy slide, sample and coverslip was similar as described for the flagella rotation analysis,

24.09.2019

*Salmonella* patho-metabolism

497 but without prior coating of the coverslip with polystyrene. The swimming bacteria were  
498 recorded for 100 frames (14 frames/s). Visualization of swimming paths was performed with  
499 ImageJ, using the plug-in MTrackJ (49).

#### 500 *qPCR*

501 For RNA preparation by 'hot phenol' method, bacteria were cultured 18.5 h in LB with aeration.  
502  $1.2 \times 10^9$  bacteria were pelleted, treated with stop-solution (95% EtOH, 5% phenol saturated  
503 with 0.1 M citrate buffer, pH 4.3 (Sigma-Aldrich) and snap-frozen in liquid nitrogen. All  
504 following steps were conducted as described in detail in Noster *et al.* (2019) according to  
505 protocols from Mattatall and Sanderson (1996) and Sittka *et al.* (2009). For cDNA synthesis  
506 the RevertAid First strand cDNA synthesis kit (ThermoFisher Scientific) was used, applying 1  
507  $\mu\text{g}$  RNA and random hexamer primers. qPCR was performed using the Maxima SYBR  
508 Green/Fluorescein qPCR Master Mix (ThermoFisher) and iCycler equipped with MyiQ module  
509 (Biorad). Data were normalized to expression levels of a house-keeping gene (16S rRNA) and  
510 calculated in consideration of primer efficiencies, which were determined before using serial  
511 dilutions of cDNA. Oligonucleotides used are listed in **Table S 4D**.

#### 512 *Flow cytometry analyses*

513 STM strains harboring p5330 were grown in LB broth at 37 °C with aeration for 18.5 h, diluted  
514 1:1000 in FACS buffer (1 % BSA in PBS, 1 mM EDTA, 20 mM HEPES pH 7.2, 50 mM  $\text{NH}_4\text{Cl}$ )  
515 and subjected to flow cytometry on an Attune NxT instrument (Thermo Fischer Scientific). The  
516 intensity of the sfGFP fluorescence per gated STM cell of 10,000 bacteria with constitutive red  
517 fluorescence was recorded and x-medians for sfGFP intensities were calculated.

518

519 **References**

- 520 1. **Vuoristo KS, Mars AE, Sanders JPM, Eggink G, Weusthuis RA.** 2016. Metabolic  
521 Engineering of TCA Cycle for Production of Chemicals. *Trends Biotechnol* **34**:191-  
522 197.
- 523 2. **Durica-Mitic S, Gopel Y, Gorke B.** 2018. Carbohydrate Utilization in Bacteria:  
524 Making the Most Out of Sugars with the Help of Small Regulatory RNAs. *Microbiol*  
525 *Spectr* **6**.
- 526 3. **Nimmo GA, Nimmo HG.** 1984. The regulatory properties of isocitrate dehydrogenase  
527 kinase and isocitrate dehydrogenase phosphatase from *Escherichia coli* ML308 and the  
528 roles of these activities in the control of isocitrate dehydrogenase. *Eur J Biochem*  
529 **141**:409-414.
- 530 4. **Tretter L, Adam-Vizi V.** 2005. Alpha-ketoglutarate dehydrogenase: a target and  
531 generator of oxidative stress. *Philos Trans R Soc Lond B Biol Sci* **360**:2335-2345.
- 532 5. **Weitzman PD.** 1966. Regulation of citrate synthase activity in *Escherichia coli*.  
533 *Biochim Biophys Acta* **128**:213-215.
- 534 6. **Gu M, Imlay JA.** 2011. The SoxRS response of *Escherichia coli* is directly activated  
535 by redox-cycling drugs rather than by superoxide. *Mol Microbiol* **79**:1136-1150.
- 536 7. **Kohanski MA, Dwyer DJ, Hayete B, Lawrence CA, Collins JJ.** 2007. A common  
537 mechanism of cellular death induced by bactericidal antibiotics. *Cell* **130**:797-810.
- 538 8. **Cameron EA, Sperandio V.** 2015. Frenemies: Signaling and Nutritional Integration in  
539 Pathogen-Microbiota-Host Interactions. *Cell Host Microbe* **18**:275-284.
- 540 9. **Deiwick J, Nikolaus T, Erdogan S, Hensel M.** 1999. Environmental regulation of  
541 *Salmonella* pathogenicity island 2 gene expression. *Mol Microbiol* **31**:1759-1773.
- 542 10. **van der Heijden J, Bosman ES, Reynolds LA, Finlay BB.** 2015. Direct measurement  
543 of oxidative and nitrosative stress dynamics in *Salmonella* inside macrophages. *Proc*  
544 *Natl Acad Sci U S A* **112**:560-565.
- 545 11. **Becker D, Selbach M, Rollenhagen C, Ballmaier M, Meyer TF, Mann M, Bumann**  
546 **D.** 2006. Robust *Salmonella* metabolism limits possibilities for new antimicrobials.  
547 *Nature* **440**:303-307.
- 548 12. **Noster J, Persicke M, Chao TC, Krone L, Heppner B, Hensel M, Hansmeier N.**  
549 2019. Impact of ROS-Induced Damage of TCA Cycle Enzymes on Metabolism and  
550 Virulence of *Salmonella enterica* serovar Typhimurium. *Front Microbiol* **10**:762.
- 551 13. **Kuo CJ, Wang ST, Lin CM, Chiu HC, Huang CR, Lee DY, Chang GD, Chou TC,**  
552 **Chen JW, Chen CS.** 2018. A multi-omic analysis reveals the role of fumarate in  
553 regulating the virulence of enterohemorrhagic *Escherichia coli*. *Cell Death Dis* **9**:381.
- 554 14. **Ruecker N, Jansen R, Trujillo C, Puckett S, Jayachandran P, Piroli GG, Frizzell**  
555 **N, Molina H, Rhee KY, Ehrt S.** 2017. Fumarase Deficiency Causes Protein and  
556 Metabolite Succination and Intoxicates *Mycobacterium tuberculosis*. *Cell Chem Biol*  
557 **24**:306-315.
- 558 15. **Kim JS, Cho DH, Heo P, Jung SC, Park M, Oh EJ, Sung J, Kim PJ, Lee SC, Lee**  
559 **DH, Lee S, Lee CH, Shin D, Jin YS, Kweon DH.** 2016. Fumarate-Mediated  
560 Persistence of *Escherichia coli* against Antibiotics. *Antimicrob Agents Chemother*  
561 **60**:2232-2240.
- 562 16. **Barak R, Eisenbach M.** 1992. Fumarate or a fumarate metabolite restores switching  
563 ability to rotating flagella of bacterial envelopes. *J Bacteriol* **174**:643-645.
- 564 17. **Prasad K, Caplan SR, Eisenbach M.** 1998. Fumarate modulates bacterial flagellar  
565 rotation by lowering the free energy difference between the clockwise and  
566 counterclockwise states of the motor. *J Mol Biol* **280**:821-828.
- 567 18. **Govons S, Vinopal R, Ingraham J, Preiss J.** 1969. Isolation of mutants of *Escherichia*  
568 *coli* B altered in their ability to synthesize glycogen. *J Bacteriol* **97**:970-972.



24.09.2019

*Salmonella* patho-metabolism

- 569 19. **Preiss J.** 2009. Glycogen: Biosynthesis and Regulation. *EcoSal Plus* **3**.
- 570 20. **Moran-Zorzano MT, Alonso-Casajus N, Munoz FJ, Viale AM, Baroja-Fernandez**  
571 **E, Eydallin G, Pozueta-Romero J.** 2007. Occurrence of more than one important  
572 source of ADPglucose linked to glycogen biosynthesis in *Escherichia coli* and  
573 *Salmonella*. *FEBS Lett* **581**:4423-4429.
- 574 21. **Eydallin G, Montero M, Almagro G, Sesma MT, Viale AM, Munoz FJ, Rahimpour**  
575 **M, Baroja-Fernandez E, Pozueta-Romero J.** 2010. Genome-wide screening of genes  
576 whose enhanced expression affects glycogen accumulation in *Escherichia coli*. *DNA*  
577 *Res* **17**:61-71.
- 578 22. **Amato SM, Orman MA, Brynildsen MP.** 2013. Metabolic control of persister  
579 formation in *Escherichia coli*. *Mol Cell* **50**:475-487.
- 580 23. **Tedin K, Norel F.** 2001. Comparison of DeltarefA strains of *Escherichia coli* and  
581 *Salmonella enterica* serovar Typhimurium suggests a role for ppGpp in attenuation  
582 regulation of branched-chain amino acid biosynthesis. *J Bacteriol* **183**:6184-6196.
- 583 24. **Rahimpour M, Montero M, Almagro G, Viale AM, Sevilla A, Canovas M, Munoz**  
584 **FJ, Baroja-Fernandez E, Bahaji A, Eydallin G, Dose H, Takeuchi R, Mori H,**  
585 **Pozueta-Romero J.** 2013. GlgS, described previously as a glycogen synthesis control  
586 protein, negatively regulates motility and biofilm formation in *Escherichia coli*.  
587 *Biochem J* **452**:559-573.
- 588 25. **Montrone M, Eisenbach M, Oesterhelt D, Marwan W.** 1998. Regulation of  
589 switching frequency and bias of the bacterial flagellar motor by CheY and fumarate. *J*  
590 *Bacteriol* **180**:3375-3380.
- 591 26. **Wadhams GH, Armitage JP.** 2004. Making sense of it all: bacterial chemotaxis. *Nat*  
592 *Rev Mol Cell Biol* **5**:1024-1037.
- 593 27. **Silverman M, Simon M.** 1974. Flagellar rotation and the mechanism of bacterial  
594 motility. *Nature* **249**:73-74.
- 595 28. **Lorkowski M, Felipe-Lopez A, Danzer CA, Hansmeier N, Hensel M.** 2014.  
596 *Salmonella enterica* invasion of polarized epithelial cells is a highly cooperative effort.  
597 *Infect Immun* **82**:2657-2667.
- 598 29. **Misselwitz B, Barrett N, Kreibich S, Vonaesch P, Andritschke D, Rout S, Weidner**  
599 **K, Sormaz M, Songhet P, Horvath P, Chabria M, Vogel V, Spori DM, Jenny P,**  
600 **Hardt WD.** 2012. Near surface swimming of *Salmonella Typhimurium* explains target-  
601 site selection and cooperative invasion. *PLoS Pathog* **8**:e1002810.
- 602 30. **Achouri S, Wright JA, Evans L, Macleod C, Fraser G, Cicuta P, Bryant CE.** 2015.  
603 The frequency and duration of *Salmonella*-macrophage adhesion events determines  
604 infection efficiency. *Philos Trans R Soc Lond B Biol Sci* **370**:20140033.
- 605 31. **Jones BD, Lee CA, Falkow S.** 1992. Invasion by *Salmonella typhimurium* is affected  
606 by the direction of flagellar rotation. *Infect Immun* **60**:2475-2480.
- 607 32. **Parkinson JS.** 1978. Complementation analysis and deletion mapping of *Escherichia*  
608 *coli* mutants defective in chemotaxis. *J Bacteriol* **135**:45-53.
- 609 33. **Morin M, Ropers D, Letisse F, Laguerre S, Portais JC, Coccagn-Bousquet M,**  
610 **Enjalbert B.** 2016. The post-transcriptional regulatory system CSR controls the balance  
611 of metabolic pools in upper glycolysis of *Escherichia coli*. *Mol Microbiol* **100**:686-700.
- 612 34. **Revelles O, Millard P, Nougayrede JP, Dobrindt U, Oswald E, Letisse F, Portais**  
613 **JC.** 2013. The carbon storage regulator (Csr) system exerts a nutrient-specific control  
614 over central metabolism in *Escherichia coli* strain Nissle 1917. *PLoS One* **8**:e66386.
- 615 35. **Pannuri A, Yakhnin H, Vakulskas CA, Edwards AN, Babitzke P, Romeo T.** 2012.  
616 Translational repression of NhaR, a novel pathway for multi-tier regulation of biofilm  
617 circuitry by CsrA. *J Bacteriol* **194**:79-89.



24.09.2019

*Salmonella* patho-metabolism

- 618 36. **Sterzenbach T, Nguyen KT, Nuccio SP, Winter MG, Vakulskas CA, Clegg S,**  
619 **Romeo T, Baumler AJ.** 2013. A novel CsrA titration mechanism regulates fimbrial  
620 gene expression in *Salmonella typhimurium*. *EMBO J* **32**:2872-2883.
- 621 37. **Montero M, Rahimpour M, Viale AM, Almagro G, Eydallin G, Sevilla A, Canovas**  
622 **M, Bernal C, Lozano AB, Munoz FJ, Baroja-Fernandez E, Bahaji A, Mori H,**  
623 **Codoner FM, Pozueta-Romero J.** 2014. Systematic production of inactivating and  
624 non-inactivating suppressor mutations at the *relA* locus that compensate the detrimental  
625 effects of complete spot loss and affect glycogen content in *Escherichia coli*. *PLoS One*  
626 **9**:e106938.
- 627 38. **Amato SM, Brynildsen MP.** 2015. Persister Heterogeneity Arising from a Single  
628 Metabolic Stress. *Curr Biol* **25**:2090-2098.
- 629 39. **Traxler MF, Zacharia VM, Marquardt S, Summers SM, Nguyen HT, Stark SE,**  
630 **Conway T.** 2011. Discretely calibrated regulatory loops controlled by ppGpp partition  
631 gene induction across the 'feast to famine' gradient in *Escherichia coli*. *Mol Microbiol*  
632 **79**:830-845.
- 633 40. **Lazzarini RA, Cashel M, Gallant J.** 1971. On the regulation of guanosine  
634 tetraphosphate levels in stringent and relaxed strains of *Escherichia coli*. *J Biol Chem*  
635 **246**:4381-4385.
- 636 41. **Fibriansah G, Veetil VP, Poelarends GJ, Thunnissen AM.** 2011. Structural basis for  
637 the catalytic mechanism of aspartate ammonia lyase. *Biochemistry* **50**:6053-6062.
- 638 42. **Kanehisa M, Goto S.** 2000. KEGG: kyoto encyclopedia of genes and genomes. *Nucleic*  
639 *Acids Res* **28**:27-30.
- 640 43. **Tran QH, Unden G.** 1998. Changes in the proton potential and the cellular energetics  
641 of *Escherichia coli* during growth by aerobic and anaerobic respiration or by  
642 fermentation. *Eur J Biochem* **251**:538-543.
- 643 44. **Datsenko KA, Wanner BL.** 2000. One-step inactivation of chromosomal genes in  
644 *Escherichia coli* K-12 using PCR products. *Proc Natl Acad Sci U S A* **97**:6640-6645.
- 645 45. **Popp J, Noster J, Busch K, Kehl A, Zur Hellen G, Hensel M.** 2015. Role of host cell-  
646 derived amino acids in nutrition of intracellular *Salmonella enterica*. *Infect Immun*  
647 **83**:4466-4475.
- 648 46. **Noster J, Chao TC, Sander N, Schulte M, Reuter T, Hansmeier N, Hensel M.** 2019.  
649 Proteomics of intracellular *Salmonella enterica* reveals roles of *Salmonella*  
650 pathogenicity island 2 in metabolism and antioxidant defense. *PLoS Pathog*  
651 **15**:e1007741.
- 652 47. **Plassmeier J, Barsch A, Persicke M, Niehaus K, Kalinowski J.** 2007. Investigation  
653 of central carbon metabolism and the 2-methylcitrate cycle in *Corynebacterium*  
654 *glutamicum* by metabolic profiling using gas chromatography-mass spectrometry. *J*  
655 *Biotechnol* **130**:354-363.
- 656 48. **Thomas Fung NK, Timo van der Zwan, Michael Wu.** 2013. Residual glycogen  
657 metabolism in *Escherichia coli* is specific to the limiting macronutrient and varies  
658 during stationary phase. *Journal of Experimental Microbiology and Immunology* **17**:83-  
659 87.
- 660 49. **Meijering E, Dzyubachyk O, Smal I.** 2012. Methods for cell and particle tracking.  
661 *Methods Enzymol* **504**:183-200.
- 662 50. **Hoffmann S, Schmidt C, Walter S, Bender JK, Gerlach RG.** 2017. Scarless deletion  
663 of up to seven methyl-accepting chemotaxis genes with an optimized method highlights  
664 key function of CheM in *Salmonella Typhimurium*. *PLoS One* **12**:e0172630.
- 665 51. **St-Pierre F, Cui L, Priest DG, Endy D, Dodd IB, Shearwin KE.** 2013. One-step  
666 cloning and chromosomal integration of DNA. *ACS Synth Biol* **2**:537-541.
- 667 52. **Wang RF, Kushner SR.** 1991. Construction of versatile low-copy-number vectors for  
668 cloning, sequencing and gene expression in *Escherichia coli*. *Gene* **100**:195-199.

24.09.2019

*Salmonella* patho-metabolism

669

670

24.09.2019

*Salmonella* patho-metabolism

671 **Tables**

672 **Table 1. Bacterial strains used in this study.**

| <b>Designation</b>                             | <b>Genotype</b>                                                                                                               | <b>Relevant defect(s)</b>                                     | <b>Reference</b>    |
|------------------------------------------------|-------------------------------------------------------------------------------------------------------------------------------|---------------------------------------------------------------|---------------------|
| <b>NCTC 12023</b>                              | wild type                                                                                                                     |                                                               | NCTC, Colindale, UK |
| <b>MvP1564</b>                                 | $\Delta$ <i>fumAC</i> ::FRT<br>$\Delta$ <i>fumB</i> ::FRT                                                                     | Fumarase A, B, C                                              | (12)                |
| <b>MvP2042</b>                                 | $\Delta$ <i>glgA</i> :: <i>aph</i>                                                                                            | Glycogen synthase                                             | This study          |
| <b>MvP2046</b>                                 | $\Delta$ <i>fumAC</i> ::FRT<br>$\Delta$ <i>fumB</i> ::FRT<br>$\Delta$ <i>glgA</i> :: <i>aph</i>                               | Fumarase A, B, C, glycogen synthase                           | This study          |
| <b>MvP1209</b>                                 | $\Delta$ <i>cheY</i> :: <i>aph</i>                                                                                            | Chemotaxis protein CheY                                       | This study          |
| <b>MvP1741</b>                                 | $\Delta$ <i>fumAC</i> ::FRT<br>$\Delta$ <i>fumB</i> ::FRT<br>$\Delta$ <i>cheY</i> :: <i>aph</i>                               | Fumarase A, B, C, chemotaxis protein Y                        | This study          |
| <b>MvP1527</b>                                 | $\Delta$ <i>cheZ</i> :: <i>aph</i>                                                                                            | Protein phosphatase CheZ                                      | This study          |
| <b>MvP1739</b>                                 | $\Delta$ <i>fumAC</i> ::FRT<br>$\Delta$ <i>fumB</i> ::FRT<br>$\Delta$ <i>cheZ</i> :: <i>aph</i>                               | Fumarase A, B, C, protein phosphatase CheZ                    | This study          |
| <b>MvP2691</b>                                 | $\Delta$ <i>fumAC</i> ::FRT<br>$\Delta$ <i>fumB</i> ::FRT<br>$\Delta$ <i>glgA</i> ::FRT                                       | Fumarase A, B, C, glycogen synthase                           | This study          |
| <b>MvP2692</b>                                 | $\Delta$ <i>fumAC</i> ::FRT<br>$\Delta$ <i>fumB</i> ::FRT<br>$\Delta$ <i>glgA</i> ::FRT<br>$\Delta$ <i>cheY</i> :: <i>aph</i> | Fumarase A, B, C, glycogen synthase, chemotaxis protein CheY  | This study          |
| <b>MvP2693</b>                                 | $\Delta$ <i>fumAC</i> ::FRT<br>$\Delta$ <i>fumB</i> ::FRT<br>$\Delta$ <i>glgA</i> ::FRT<br>$\Delta$ <i>cheZ</i> :: <i>aph</i> | Fumarase A, B, C, glycogen synthase, protein phosphatase CheZ | This study          |
| <b>MvP1517</b>                                 | $\Delta$ <i>gltA</i> ::FRT                                                                                                    | Citrate synthase                                              | This study          |
| <b>MvP1576</b>                                 | $\Delta$ <i>acnA</i> ::FRT<br>$\Delta$ <i>acnB</i> ::FRT                                                                      | Aconitase A, B                                                | (12)                |
| <b>MvP1482</b>                                 | $\Delta$ <i>icdA</i> ::FRT                                                                                                    | Isocitrate dehydrogenase                                      | This study          |
| <b>MvP1165</b>                                 | $\Delta$ <i>sucAB</i> ::FRT                                                                                                   | $\alpha$ -ketoglutarate dehydrogenase                         | This study          |
| <b>MvP1523</b>                                 | $\Delta$ <i>sdhCDAB</i> ::FRT                                                                                                 | Succinate-dehydrogenase subunits A, B, C, D                   | (12)                |
| <b>MvP1524</b>                                 | $\Delta$ <i>sucCD</i> ::FRT                                                                                                   | Succinate-CoA ligase                                          | This study          |
| <b>MvP1484</b>                                 | $\Delta$ <i>mdh</i> ::FRT                                                                                                     | Malate dehydrogenase                                          | This study          |
| <b>MvP2862</b>                                 | $\Delta$ <i>relA</i> ::FRT<br>$\Delta$ <i>spoT</i> :: <i>aph</i>                                                              | (p)ppGpp synthetase 1 and 2                                   | This study          |
| <b>MvP2863</b>                                 | $\Delta$ <i>fumAC</i> ::FRT<br>$\Delta$ <i>fumB</i> ::FRT<br>$\Delta$ <i>relA</i> ::FRT<br>$\Delta$ <i>spoT</i> :: <i>aph</i> | Fumarase A, B, C, (p)ppGpp synthetase 1 and 2                 | This study          |
| <b>Donor strains used for P22 transduction</b> |                                                                                                                               |                                                               |                     |
| <b>MvP1209</b>                                 | $\Delta$ <i>cheY</i> :: <i>aph</i>                                                                                            | Chemotaxis protein CheY                                       | (28)                |

24.09.2019

*Salmonella* patho-metabolism

|                |                                          |                                               |               |
|----------------|------------------------------------------|-----------------------------------------------|---------------|
| <b>MvP1527</b> | $\Delta cheZ::aph$                       | Protein phosphatase CheZ                      | (28)          |
| <b>KT9616</b>  | $\Delta relA::aph$                       | (p)ppGpp synthetase 1                         | Karsten Tedin |
| <b>KT9684</b>  | $\Delta relA::FRT$<br>$\Delta spoT::aph$ | Fumarase A, B, C, (p)ppGpp synthetase 1 and 2 | Karsten Tedin |
| <b>MvP2042</b> | $\Delta glgA::aph$                       | Glycogen synthase                             | This study    |

673 **Table 2. Plasmids used in this study.**

| <b>Plasmid</b> | <b>Relevant characteristics</b>                                                                                     | <b>Reference</b>                          |
|----------------|---------------------------------------------------------------------------------------------------------------------|-------------------------------------------|
| <b>pKD46</b>   | Red-expressing vector, <i>ts</i> , Amp <sup>R</sup>                                                                 | (44)                                      |
| <b>pWRG730</b> | Red-expressing vector, <i>ts</i> , Cm <sup>R</sup>                                                                  | (50)                                      |
| <b>pKD13</b>   | Template plasmid containing kanamycin cassette, recombinase target sites (FRT), Amp <sup>R</sup> , Kan <sup>R</sup> | (44)                                      |
| <b>pE-FLP</b>  | flippase-expressing vector, <i>ts</i> , Amp <sup>R</sup>                                                            | (51)                                      |
| <b>pCP20</b>   | flippase-expressing vector, <i>ts</i> , Amp <sup>R</sup>                                                            | (44)                                      |
| <b>pWSK29</b>  | Low copy number cloning vector, Amp <sup>R</sup>                                                                    | (52)                                      |
| <b>pWSK30</b>  | Low copy number cloning vector, Amp <sup>R</sup>                                                                    | (52)                                      |
| <b>p3752</b>   | pWSK30:: <i>P<sub>fumA</sub>::fumAC</i> , Amp <sup>R</sup>                                                          | This study                                |
| <b>p3756</b>   | pWSK30:: <i>P<sub>fumB</sub>::fumB</i> , Amp <sup>R</sup>                                                           | This study                                |
| <b>p4763</b>   | pWSK29:: <i>P<sub>glgB</sub>::glgBXCAP</i> , Amp <sup>R</sup>                                                       | This study                                |
| <b>p4889</b>   | P <sub>EM7</sub> ::DsRed P <sub>uhpT</sub> ::sfGFP                                                                  | (12), Röder and Hensel, 2019, in revision |
| <b>p5371</b>   | P <sub>EM7</sub> ::DsRed P <sub>wraB</sub> ::sfGFP                                                                  | This study                                |

674

24.09.2019

*Salmonella* patho-metabolism

675 **Figure Legends**

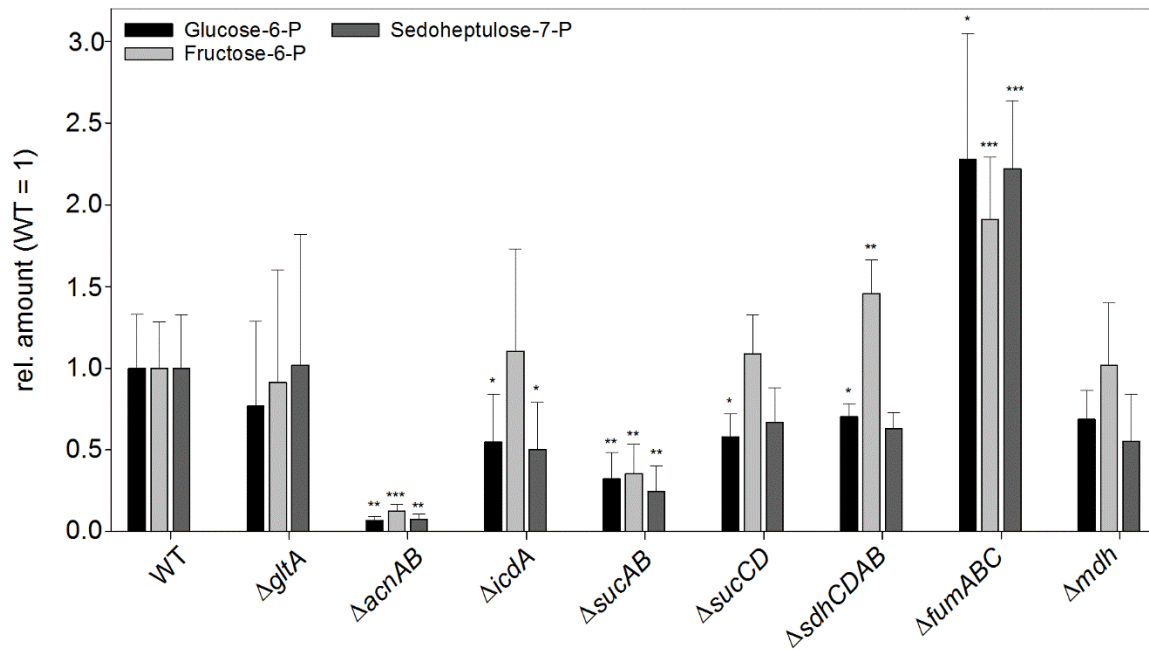

676

677 **Fig. 1. Defects in TCA cycle enzymes affect metabolite concentrations.** STM WT and  
678 mutant strains defective in TCA cycle enzymes were grown aerobically in LB broth for 18.5 h  
679 at 37 °C. Cells were harvested, disrupted and metabolites extracted for subsequent GC-MS  
680 analyses. Metabolite concentrations were normalized to levels of WT, and means and standard  
681 deviations of at least four biological replicates are shown. Statistical analyses were performed  
682 by Student's *t*-test and significances are indicated as follows: \*,  $p < 0.05$ ; \*\*,  $p < 0.01$ ; \*\*\*,  $p$   
683  $< 0.001$ .

684

24.09.2019

*Salmonella* patho-metabolism

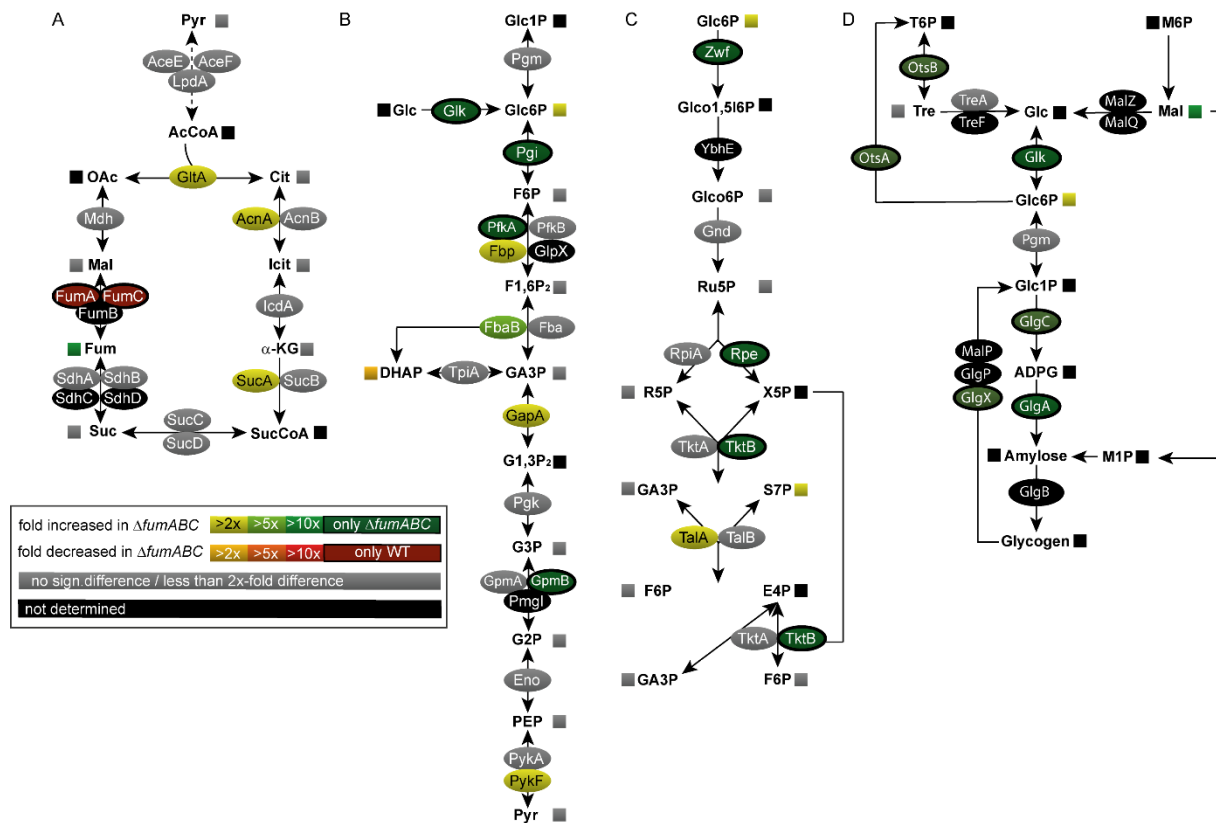

685

686 **Fig. 2. Deletion of fumarases leads to changes in carbon fluxes and amounts of metabolic**  
 687 **enzymes.** STM WT and  $\Delta fumABC$  strains were grown aerobically in LB broth for 18.5 h at  
 688 37 °C. For the proteomic approach, harvested cells were lysed and proteins precipitated with  
 689 10% TCA. After trypsin digest, the peptides were analyzed by quantitative LC-MS<sup>E</sup>. For  
 690 metabolomics analyses, harvested cells were disrupted and metabolites were extracted for GC-  
 691 MS analysis. Heat map colors of oval symbols indicate relative changes in amounts of enzymes  
 692 detected for  $\Delta fumABC$  compared to WT. Heat map colors of square symbols indicate relative  
 693 changes in amounts of metabolites determined in  $\Delta fumABC$  compared to WT. Grey symbols  
 694 indicate less than 2-fold or not significant differences in enzyme or metabolite amounts.  
 695 Quantitative data are shown for TCA cycle (A), glycolysis (B), pentose phosphate pathway (C),  
 696 and glycogen synthesis (D). Data represent means of at least four or three biological replicates  
 697 for the metabolomics or proteomics analyses, respectively. Statistical analyses were performed  
 698 by Student's *t*-test and all data shown have significance differences between the two strains of  
 699  $p < 0.05$  or lower.

24.09.2019

*Salmonella* patho-metabolism

700

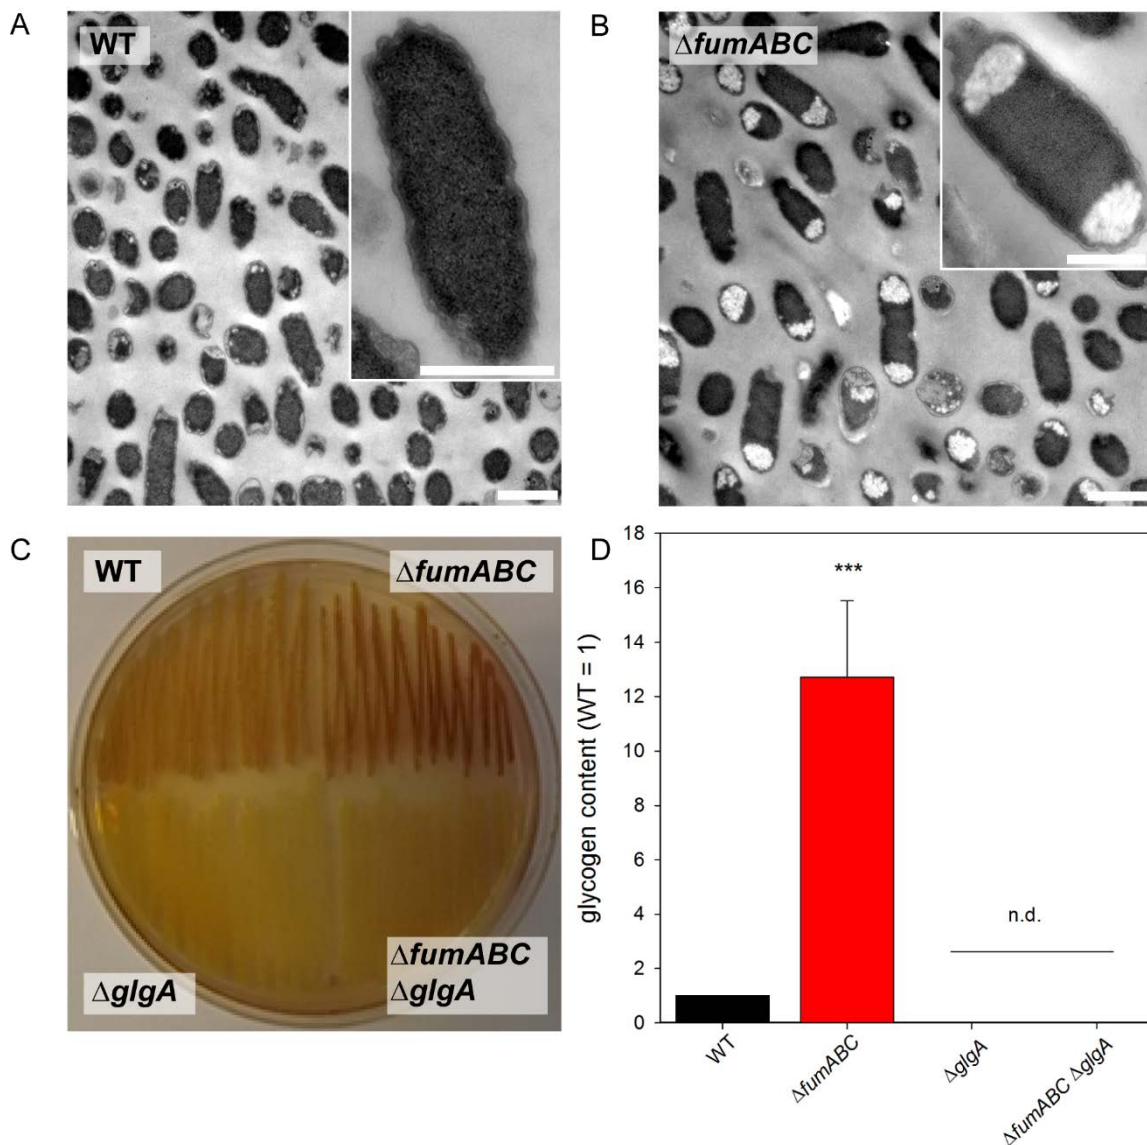

701

702 **Fig. 3. Deletion of fumarases leads to increased glycogen accumulation.** STM WT (A) and

703  $\Delta fumABC$  (B) strains were grown aerobically for 18.5 h at 37 °C in LB broth. Cells were fixed,

704 dehydrated, resin embedded and ultrathin section were prepared for TEM. Massive

705 accumulations of polymers in the polar regions of  $\Delta fumABC$  cells were observed frequently.

706 Scale bars, 1 μm (overview), 500 nm (detail). C) STM WT,  $\Delta glgA$ ,  $\Delta fumABC$ , and  $\Delta fumABC$

707  $\Delta glgA$  strains were grown on LB agar plates for 18.5 h at 37 °C. Potassium iodine staining was

708 performed and brownish color indicates intercalation of iodine with glycogen. D)

709 Quantification of glycogen contents of STM strains grown aerobically for 18.5 h in LB broth.



24.09.2019

*Salmonella* patho-metabolism

710 Glycogen was degraded to glucose monomers using amyloglucosidase, and resulting glucose  
711 was phosphorylated to G6P. G6P was oxidized by G6P dehydrogenase in the presence of NAD,  
712 being reduced to NADH. Glucose concentrations were proportional to OD<sub>340</sub>. By subtraction  
713 of free glucose concentrations (sample without amyloglucosidase) from total glucose  
714 concentrations, glycogen amounts were quantified. Glycogen concentrations were normalized  
715 to WT (=1), error bars represent standard deviations of four biological replicates. n.d., not  
716 detected. Statistical analyses were performed by Student's *t*-test and significances are indicated  
717 as follows: \*\*\*,  $p < 0.001$ .  
718



24.09.2019

*Salmonella* patho-metabolism

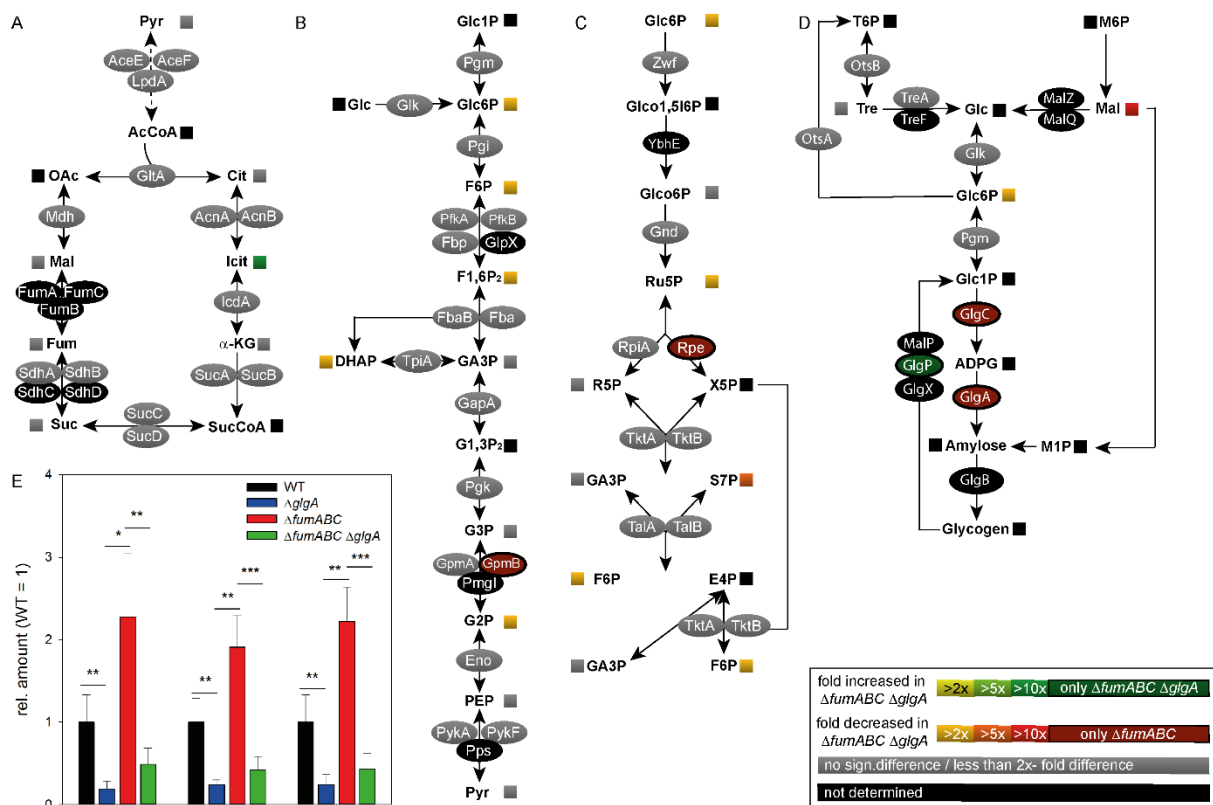

719

720 **Fig. 4. Deletion of glycogen synthase in a  $\Delta fumABC$  strain restores carbon fluxes without**

721 **changes in amounts of metabolic enzymes.** STM  $\Delta fumABC$  and  $\Delta fumABC \Delta glgA$  were grown

722 aerobically in LB broth for 18.5 h at 37 °C. Analyses of metabolic enzymes and metabolites

723 were performed as described for **Fig. 2** and comparison of STM  $\Delta fumABC \Delta glgA$  to  $\Delta fumABC$

724 are shown for TCA cycle (A), glycolysis (B), pentose phosphate pathway (C), and glycogen

725 synthesis (D). Data represent means of at least four or three biological replicates for the

726 metabolomics or proteomics analyses, respectively. The concentrations of metabolites glucose-

727 6-phosphate (G6P), fructose-6-phosphate (F6P) and sedoheptulose-7-phosphate (S7P) were

728 determined and normalized to WT (=1) (E). Statistical analyses were performed by Student's

729 *t*-test and all data shown have significance differences between the two strains of  $p < 0.05$  or

730 lower: \*,  $p < 0.05$ ; \*\*,  $p < 0.01$ ; \*\*\*,  $p < 0.001$ .

731

24.09.2019

*Salmonella* patho-metabolism

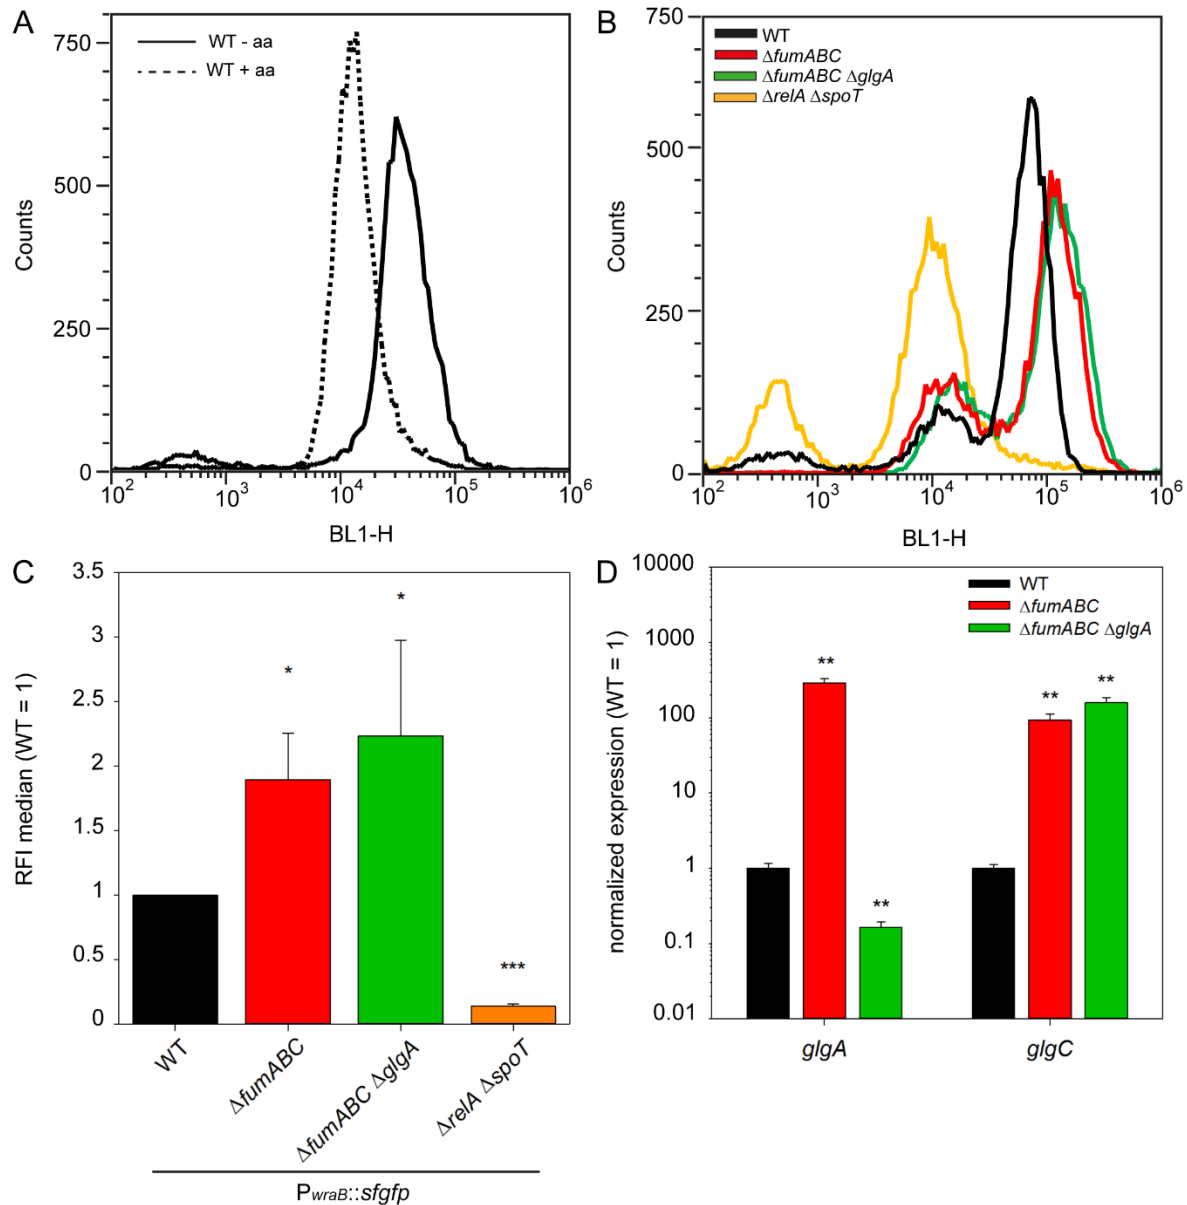

732

733 **Fig. 5. Differential expression of glycogen synthesizing enzymes due to increased**

734 **(p)ppGpp levels in  $\Delta fumABC$ .** A) STM WT harboring a dual color fluorescence reporter for

735 *wraB* was cultured in LB o/n and subcultured in minimal medium with or without amino acid

736 (= aa) supplementation (dashed or undashed line, respectively). After 3 h of growth cells were

737 subjected to flow cytometry and sfGFP fluorescence intensity (BL1-H) recorded. Shown is one

738 representative of three independent biological replicates. B) Representative data of WT,

739  $\Delta fumABC$ ,  $\Delta fumABC \Delta glgA$  and  $\Delta relA \Delta spoT$  strains harboring the *wraB* reporter grown o/n in

24.09.2019

*Salmonella* patho-metabolism

740 LB broth. C) Medians of relative sfGFP fluorescence intensities of strains mentioned in (B).  
741 Data were normalized to WT (=1) and represent average values and standard deviation of three  
742 biological replicates. D) WT,  $\Delta fumABC$  and  $\Delta fumABC \Delta glgA$  strains were cultured o/n in LB  
743 broth, RNA was extracted and used for cDNA synthesis and consecutive qPCR experiments.  
744 16s rRNA expression levels were used for normalization. Depicted are the expression levels  
745 normalized to WT (=1) of *glgA* and *glgC*. Shown is one representative assay of three  
746 independent biological replicates, consisting each of three technical replicates. Statistical  
747 analyses were performed by Student's *t*-test and significances are indicated as follows: \*,  $p <$   
748 0.05; \*\*,  $p < 0.01$ ; \*\*\*,  $p < 0.001$ .  
749



24.09.2019

*Salmonella* patho-metabolism

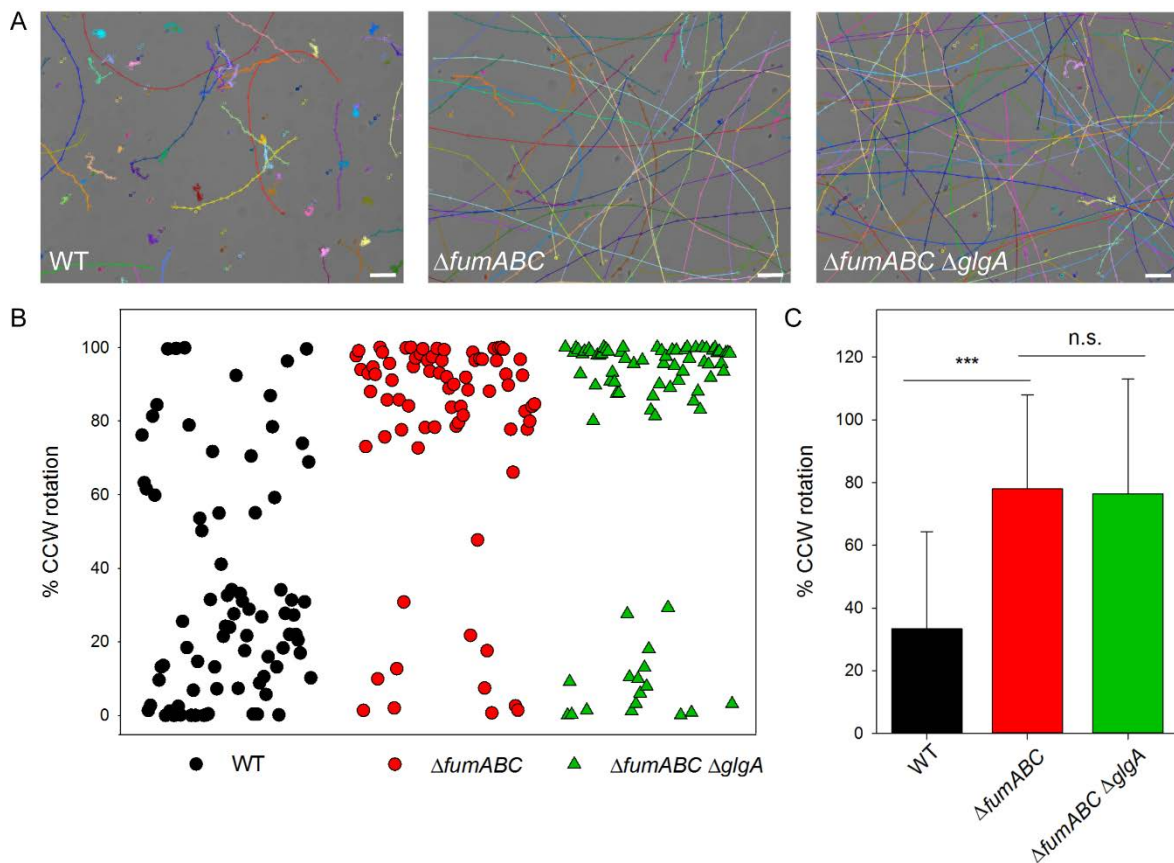

763

764 **Fig. 7. Fumarase deletions increase CCW flagella rotation and running motility in a *glgA*-**

765 **independent manner.** A) STM WT and mutant strains were cultured in LB broth for 18.5 h at

766 37 °C and diluted 1:20 in PBS. Aliquots of the cultures were spotted onto microscope slides

767 and bacterial motion was recorded at 14 frames/s for 100 frames. For manual path tracking, the

768 ImageJ plugin MTrackJ was used. Paths of individual STM WT,  $\Delta fumABC$  or  $\Delta fumABC \Delta glgA$

769 cells are indicated by various colors. Scale bars, 10  $\mu$ m. B) Bacteria were cultured for 18.5 h in

770 LB, diluted 1:100 in PBS, subjected to shear force to remove flagellar filaments, and bound to

771 polystyrene-coated coverslips. Rotating cells were selected and rotation direction was recorded

772 using the Axio Observer microscope with an AxioCam CCD camera (Zeiss) for periods of 18 s.

773 Rotation analyses were performed using the tool SpinningBug Tracker. By detection of the

774 angle between the rotating bacteria and a reference axis, the rotation direction was calculated.

775 Each dot represents the analysis of one bacterial cell. The experimental setup and definitions

776 are illustrated in **Fig. S 5**. C) Quantification of CCW bias of single STM cells. Means and

24.09.2019

*Salmonella* patho-metabolism

777 standard deviations are shown for at least 75 cells per strain. Statistical analyses were performed  
778 by Rank Sum Test and significances are indicated as follows: \*\*\*,  $p < 0.001$ ; n.s., not  
779 significant.

780

24.09.2019

*Salmonella* patho-metabolism

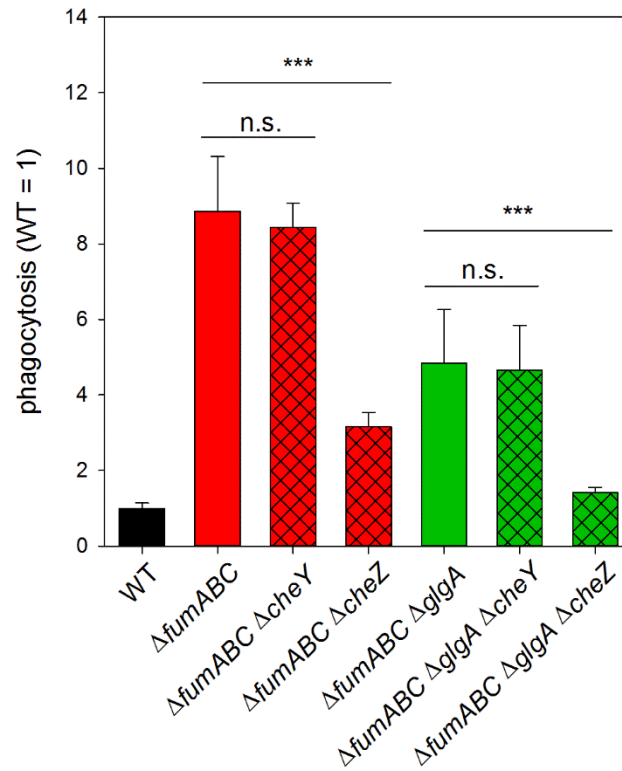

781

782 **Fig. 8. Increased phagocytic uptake of fumarase deletion strains is dependent on CCW**

783 **flagella rotation and glycogen synthesis. STM WT and various mutant strains as indicated**

784 were grown for 18.5 h in LB broth and used to infect RAW264.7 macrophages at an MOI of 1.

785 Infection was synchronized by centrifugation for 5 min., followed by incubation for 25 min. at

786 37 °C. Next, non-internalized bacteria were removed by washing and treatment with gentamicin

787 at 100 µg/ml for 1 h and 10 µg/ml for the remaining time. Cells were lysed 2 h after infection

788 by addition of 0.1% Triton X-100 and lysates were plated onto MH agar plates to determine the

789 CFU of internalized bacteria. Phagocytosis rates were determined as percentage of internalized

790 bacteria in dependence of the used inoculum. Values were normalized to WT (=1), and means

791 and standard deviations of three technical replicates are shown. Statistical analyses were

792 performed by Student's *t*-test and significances are indicated as follows: \*\*\*,  $p < 0.001$ ; n.s.,

793 not significant.

794

24.09.2019

*Salmonella* patho-metabolism

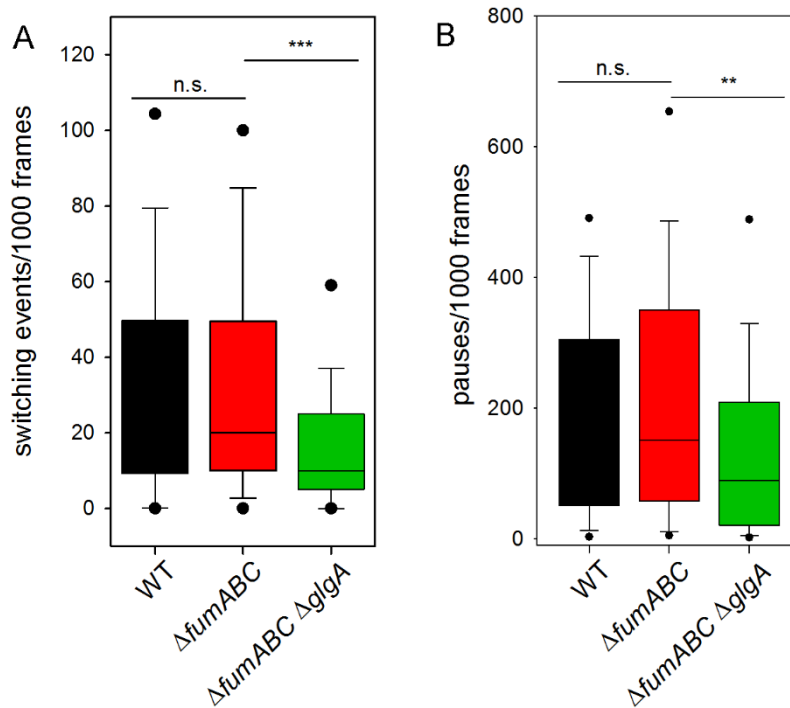

795

796 **Fig. 9. Deletion of fumarases and glycogen synthase effect the number of flagellar**

797 **switching events and pauses. A) Distribution of the number of switching events within 1,000**

798 frames (total of 17.54 s) was calculated using flagella rotation analysis (**Fig. 7**). B) Distribution

799 of pauses within 1000 frames. Pause is defined as movement of the bacterial body less than

800  $5^\circ$ /frame. Values within the 5/95% percentiles are excluded. Calculations are based on at least

801 75 analyzed bacteria. Statistical analyses were performed by Rank Sum Test and significances

802 are indicated as follows: \*\*,  $p < 0.01$ ; \*\*\*,  $p < 0.001$ ; n.s., not significant.

803



24.09.2019

*Salmonella* patho-metabolism

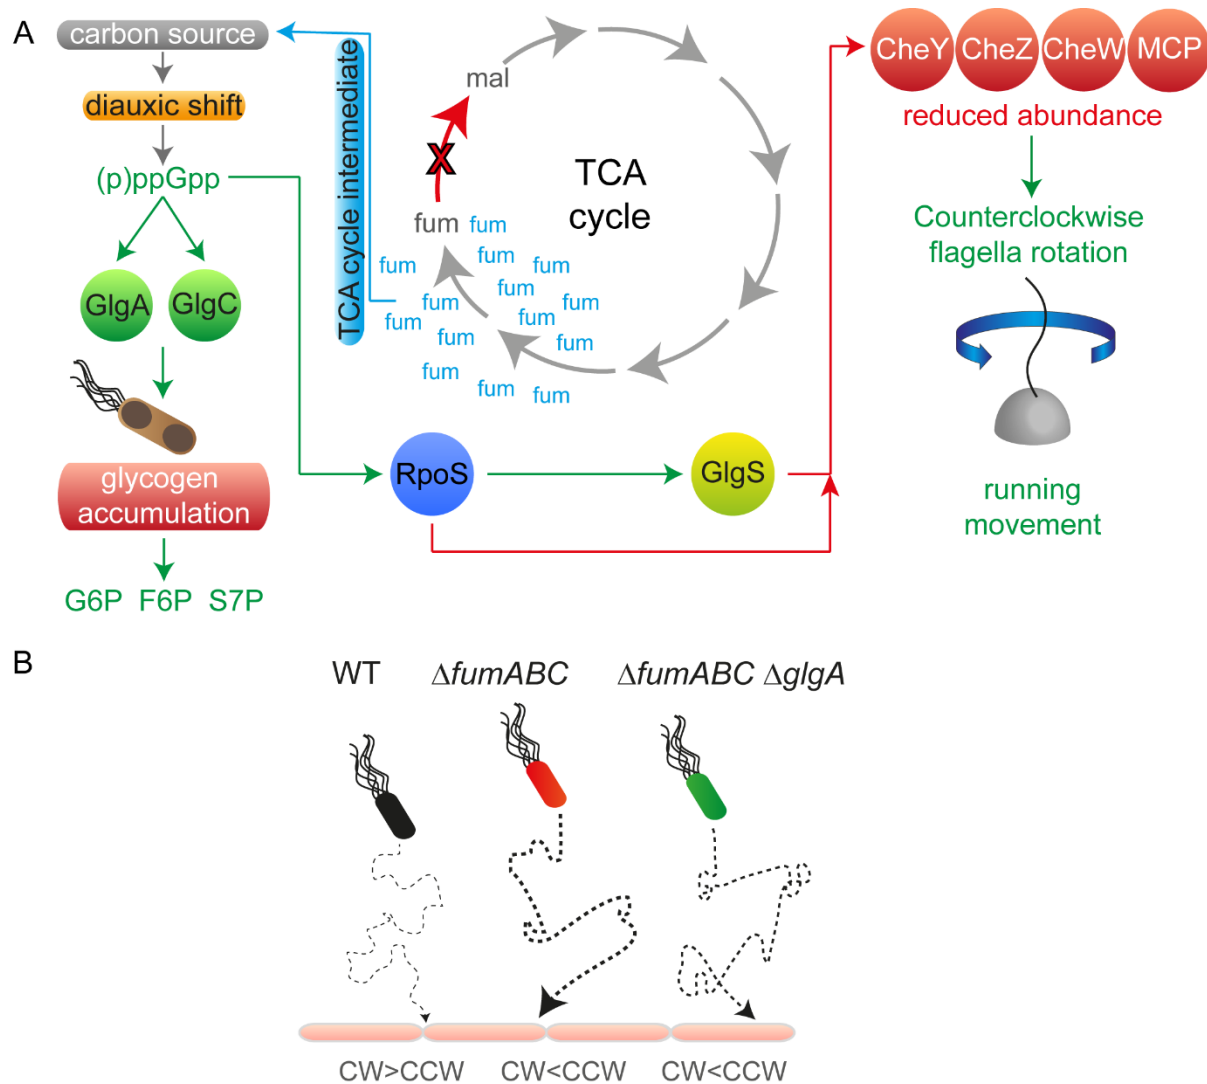

804

805 **Fig. 10. Model summarizing effects of fumarase deletion on STM patho-physiology. A)**

806 Fumarase deletion leads to fumarate accumulation. If present in high concentrations it is used  
807 as carbon source, which induces a kind of diauxic shift and increased (p)ppGpp concentrations.

808 The alarmone accelerates the expression of glycogen synthesizing enzymes and glycogen  
809 accumulation occurs. This metabolic shift is accompanied by increased concentrations of

810 glycolytic and PPP intermediates. (p)ppGpp strengthens RpoS biosynthesis, which in turn  
811 enhances GlgS abundance. GlgS and RpoS reduce expression of chemotaxis genes, leading to

812 decreased CheY levels and enhanced CCW flagella rotation. B) Swimming behavior biases

813 phagocytic uptake rates. WT flagella are mainly rotating CW, resulting in tumbling. Due to

814 reduced numbers of cell contacts with the host cell, phagocytic uptake is low. STM  $\Delta fumABC$

24.09.2019

*Salmonella* patho-metabolism

815 and  $\Delta fumABC \Delta glgA$  show both increased CCW rotation and running movement, raising the  
816 number of host cell contacts and by this phagocytic uptake. STM  $\Delta fumABC \Delta glgA$  exhibits  
817 prolonged CW periods, which possibly leads to slight reductions of phagocytosis rates.

818

819 **Suppl. Materials**

820 **Suppl. Tables**

821 Table S 1. Metabolomics, TCA cycle enzyme deletion strains, *glgA*, *fumABC glgA* strains

822

823 Table S 2. Proteomics, WT vs. *fumABC* strains

824

825 Table S 3. Proteomics, *fumABC* vs. *fumABC glgA* strains

826

827 Table S 4. Oligonucleotides used in this study

828 A) Oligonucleotides used for mutagenesis

| Designation              | Sequence 5' - 3'                                             | Template |
|--------------------------|--------------------------------------------------------------|----------|
| <i>glgA</i> -Red-Del-for | AGGTCAAACAGGAGCGATAATGCAGGTTTTACATGTATGTATTCCGGGGATCCGTCGACC | pKD13    |
| <i>glgA</i> -Red-Del-rev | TAAACGGAGCATTCATATAAATGATTCCTGGATGACTATTTGTAGGCTGGAGCTGCTTCG |          |

|                         |                                                              |       |
|-------------------------|--------------------------------------------------------------|-------|
| <i>gltA</i> -Del13-for  | GTACCGGATGGCGAGGGTTGCGTCGCCATCCGGTTGTCAAATTCCGGGGATCCGTCGACC |       |
| <i>gltA</i> -Del13-rev  | AGGCATTTTGTTCATCGCGGTTTCCCGATTGACCAGCTTGTAGGCTGGAGCTGCTTCG   |       |
| <i>icdA</i> -Del13-for  | TGACAGACGAGCAAACCAGAAGCGCTCGAAGGAGAGGTGAATTCCGGGGATCCGTCGACC |       |
| <i>icdA</i> -Del13-rev  | GACGTTAAGTCCCCGTTTTTTGTTTTTAACAATTATCGTTAGTAGGCTGGAGCTGCTTCG |       |
| <i>sucAB</i> -Del-for   | GTATTAATAAGCAGAAAAGATGCTTAAGGGATCACGATGGTGTAGGCTGGAGCTGCTTC  | pKD4  |
| <i>sucAB</i> -Del-rev   | CCGGCCTACAGGTAGCAGGTGATGCTCTTGCTGACTACACCATATGAATATCCTCCTTAG |       |
| <i>sucCD</i> -Del13-for | GGTCTAAAGATAACGATTACCTGAAGGATGGACAGAACACATTCCGGGGATCCGTCGACC | pKD13 |
| <i>sucCD</i> -Del13-rev | GAAAACGGACATTTATCTGTTCCCGCAGGAACAGCGAGTTGTAGGCTGGAGCTGCTTCG  |       |
| <i>mdh</i> -Del13-for   | GCAATAGACACTTAGCTAATCATATAATAAGGAGTTTAGGATTCGGGGATCCGTCGACC  |       |
| <i>mdh</i> -Del13-rev   | AGAAGCCGGAGCAAAGCCCCGGCATCGGGCAGGAACAGCGTAGGCTGGAGCTGCTTCG   |       |

829

## B) Oligonucleotides used to confirm gene deletions

| Designation                  | Sequence 5' - 3'      |
|------------------------------|-----------------------|
| <i>glgA</i> -Del-Check-for   | GGTGCAATCTGTGCTCTTCC  |
| <i>glgA</i> -Del-Check-rev   | GCTCCACCAGACGATCGCGC  |
| <i>fumA</i> -delcheck13-for  | CAGAGAATAACCATACCGAG  |
| <i>fumA</i> C-delcheck13-rev | CAGCAGAAACAGGTGCAAC   |
| <i>fumB</i> -delcheck13-for  | GCTGGATCTTTGCCGCAATG  |
| <i>fumB</i> -delcheck13-rev  | GTGAGCATGGTCTCTCGTG   |
| <i>gltA</i> -delcheck13-for  | GCAGCGATAACAGGAACAAC  |
| <i>gltA</i> -delcheck13-rev  | CTTAAGCAATAAGGCGCTAAG |
| <i>icdA</i> -delcheck13-for  | CTAACGCAGTCGTGCAGCAG  |
| <i>icdA</i> -delcheck13-rev  | CTATTGCGGTCTGAATTGAG  |
| <i>sucA</i> -DelCheck-For    | CTCGTCATAGTTCACGTTGC  |
| <i>sucB</i> -DelCheck-Rev    | TCTTTAGACCTGTAGGCCTG  |
| <i>sucCD</i> -DelCheck13-for | TCCCTGGTCACCATCAAAGAG |
| <i>sucCD</i> -DelCheck13-rev | TAAAGGTGGCCAACCATGTC  |
| <i>mdh</i> -DelCheck13-for   | GCATTCTTGATGAGTGAGG   |
| <i>mdh</i> -DelCheck13-rev   | GGAGTTTAGCAGATTTAGTGC |

|                           |                      |
|---------------------------|----------------------|
| <i>cheY</i> -DelCheck-For | CGAAGCAAGTTGTGTGGTG  |
| <i>cheZ</i> -DelCheck-Rev | AAACCATTCGCGCCGATAG  |
| k1-red-del                | CAGTCATAGCCGAATAGCCT |
| k2-red-del                | CGGTGCCCTGAATGAACTGC |

## 830 C) Oligonucleotides used for generation of complementation and reporter plasmids

| Plasmid | designation                 | Sequence 5' - 3'                           |
|---------|-----------------------------|--------------------------------------------|
| p3752   | <i>fumAC</i> -komp NotI-for | CGTTAGGCGGCCGCGGCGCACAGTACTTTAAACAG        |
|         | <i>fumAC</i> -komp XhoI-rev | CCTAGACTCGAGGCATTAATCAACACGGACAAC          |
| p3756   | <i>fumB</i> -komp ApaI-for  | CGTTACGGGCCCTGTGGTACGACCAGCGATG            |
|         | <i>fumB</i> -komp XhoI-rev  | CCTAGACTCGAGGTATTATCCCATGCCGAGAGTG         |
| p4763   | Vf-pWSK29                   | GAATTCCTGCAGCCCGGGG                        |
|         | Vr-pWSK29                   | GGTACCCAATTCGCCCTATAGTGAGTC                |
|         | 1f- <i>glgP</i> -pWSK29     | CCCGGGCTGCAGGAATTCTACTCGACCCTTTTCCATGACAGA |
|         | 1r-pWSK29-P <i>glgB</i>     | TAGGGCGAATTGGGTACCTTGCAGCGCTTATCGGGC       |
| p4889   | Vf-p4889                    | ATGCGCAAAGGCGAAGAAGTGTTTACCGGTGTGGTGCCGA   |
|         | Vr-p4889                    | GGCCGGCATCACCGGCCGCCACAGGTGCGGTTG          |
| p5371   | 1f-PwraB-p4889-2            | CCGGTGATGCCGGCCAACCGAAATATTCTGCAACA        |
|         | 1r-PwraB-p4889-2            | CTTCGCCTTTGCGCATATTGTACTACTCCTCAGATTAAT    |

## 831 D) Oligonucleotides used for qPCR

| Designation            | Sequence 5' - 3'     | Target gene |
|------------------------|----------------------|-------------|
| <i>glgA</i> -qPCR-for2 | GACCATATAACGGCGGTGAG | <i>glgA</i> |
| <i>glgA</i> -qPCR-rev2 | CGTTCAGTATGCCGGACAAG |             |
| <i>glgC</i> -qPCR-for  | CTGGTGACGCCAGCAAATCG | <i>glgC</i> |
| <i>glgC</i> -qPCR-rev  | GGAAAGGATGCGCGTAAGCC |             |
| 16SrRNA-qPCR-for4      | GGTCTGTCAAGTCGGATGTG | 16S rRNA    |
| 16SrRNA-qPCR-rev4      | CCTGAGCGTCAGTCTTTGTC |             |

832

833 **Suppl. Figures and Legends**

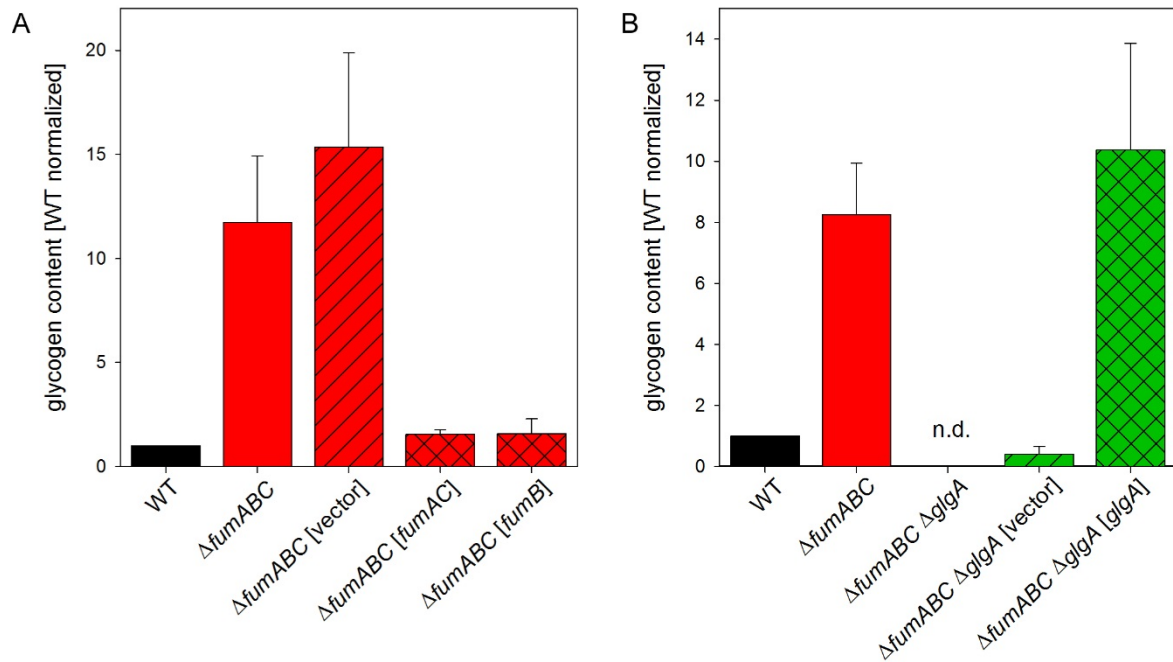

834

835

836 **Fig. S 1. Glycogen accumulation in the  $\Delta fumABC$  mutant strain is dependent on the**  
837 **deletion of all fumarase isoforms and an intact glycogen synthase.** Quantification of  
838 glycogen contents of STM strains occurred as described in **Fig. 3**. A) Complementation of the  
839  $\Delta fumABC$  deletion strain harboring plasmids encoding the intact genes *fumAC* or *fumB* gene  
840 under control of their native promoter or the empty vector, respectively. B) Complementation  
841 of the  $\Delta fumABC \Delta glgA$  deletion strain with plasmids encoding the intact gene *glgA* or the empty  
842 vector, respectively. Glycogen concentrations were normalized to WT (=1), error bars represent  
843 standard deviations of two independent biological replicates, each consisting of two technical  
844 replicates.

24.09.2019

*Salmonella* patho-metabolism

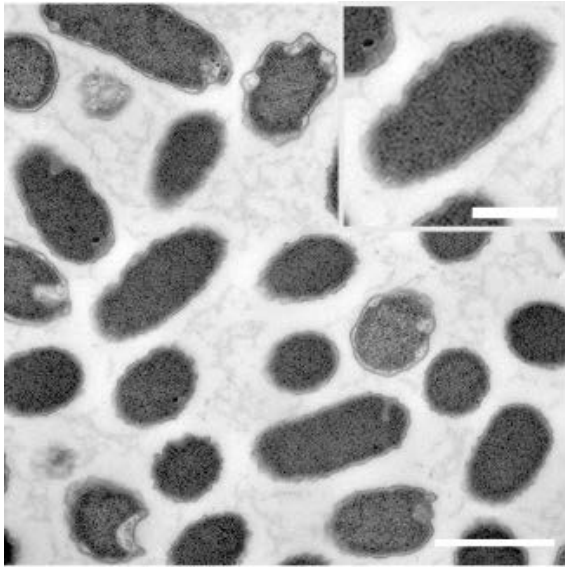

845

846

847 **Fig. S 2. Absence of granula accunulation in STM  $\Delta fumABC$  by glycogen synthase**

848 **deletion.** Electron micrographs of STM  $\Delta fumABC$   $\Delta glgA$ , aerobically grown for 18.5 h in LB

849 broth. Note the absence of polymers accumulations of in the polar regions of the bacterium.

850 Scale bars, 1  $\mu\text{m}$  (overview), 0.5  $\mu\text{m}$  (detail).

851

24.09.2019

*Salmonella* patho-metabolism

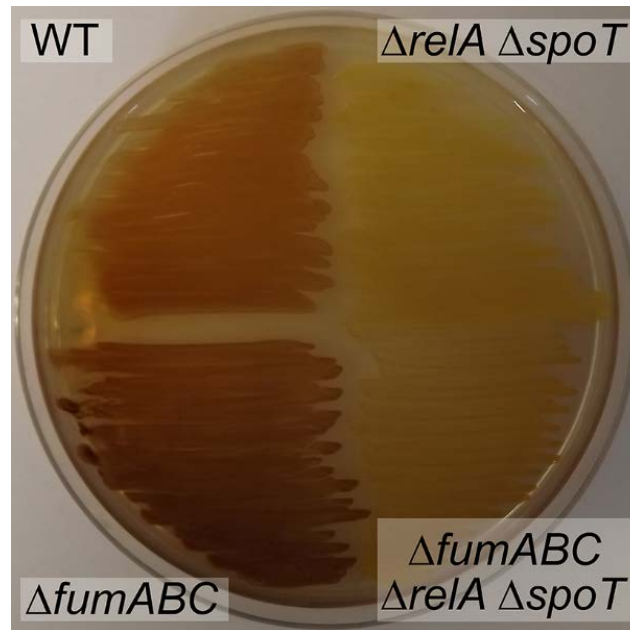

852

853

854 **Fig. S 3. Glycogen accumulation in  $\Delta fumABC$  depends on (p)ppGpp synthesizing enzymes.**

855 STM WT,  $\Delta fumABC$ ,  $\Delta relA spoT$  and  $\Delta fumABC \Delta relA \Delta spoT$  strains were grown on LB agar

856 plates for 18.5 h at 37 °C. Potassium iodine staining was performed and brownish color

857 indicates intercalations of iodine with glycogen.



24.09.2019

*Salmonella* patho-metabolism

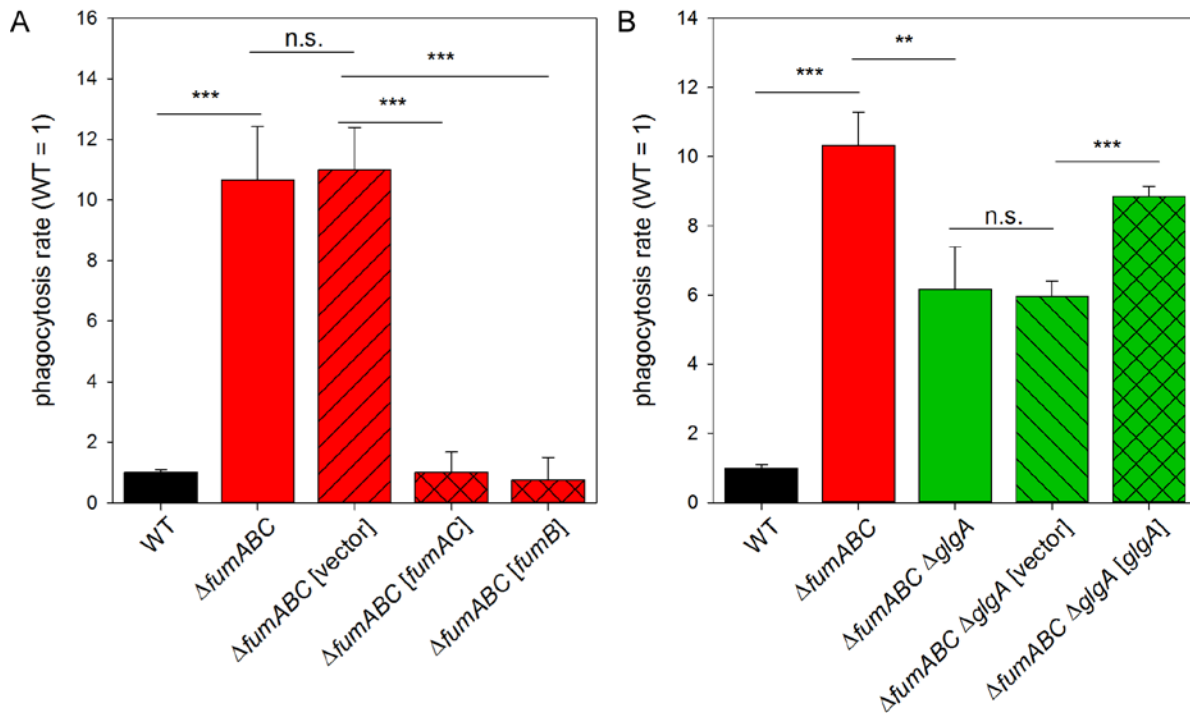

858

859

860 **Fig. S 4. Deletion of fumarases increases the phagocytic uptake by RAW264.7**

861 **macrophages and is dependent on glycogen synthesis.** RAW264.7 macrophages were

862 infected as described for **Fig. 8**. Values were normalized to WT (=1), and means and standard

863 deviations of three technical replicates are shown. A) RAW264.7 macrophages were infected

864 with WT,  $\Delta fumABC$  and  $\Delta fumABC$  strains harboring plasmids encoding the intact genes *fumAC*

865 or *fumB* gene under control of their native promoter or the empty vector, respectively. B)

866 RAW264.7 macrophages were infected with WT,  $\Delta fumABC$ ,  $\Delta fumABC \Delta glgA$  and  $\Delta fumABC$

867  $\Delta glgA$  strains harboring a plasmid encoding wild-type GlgA under control of its native

868 promoter, or the empty vector, respectively. The data are representative for three independent

869 biological replicates. Statistical analyses were performed by Student's *t*-test and significances

870 are indicated as follows: \*\*,  $p < 0.01$ ; \*\*\*,  $p < 0.001$ ; n.s., not significant.

871

24.09.2019

*Salmonella* patho-metabolism

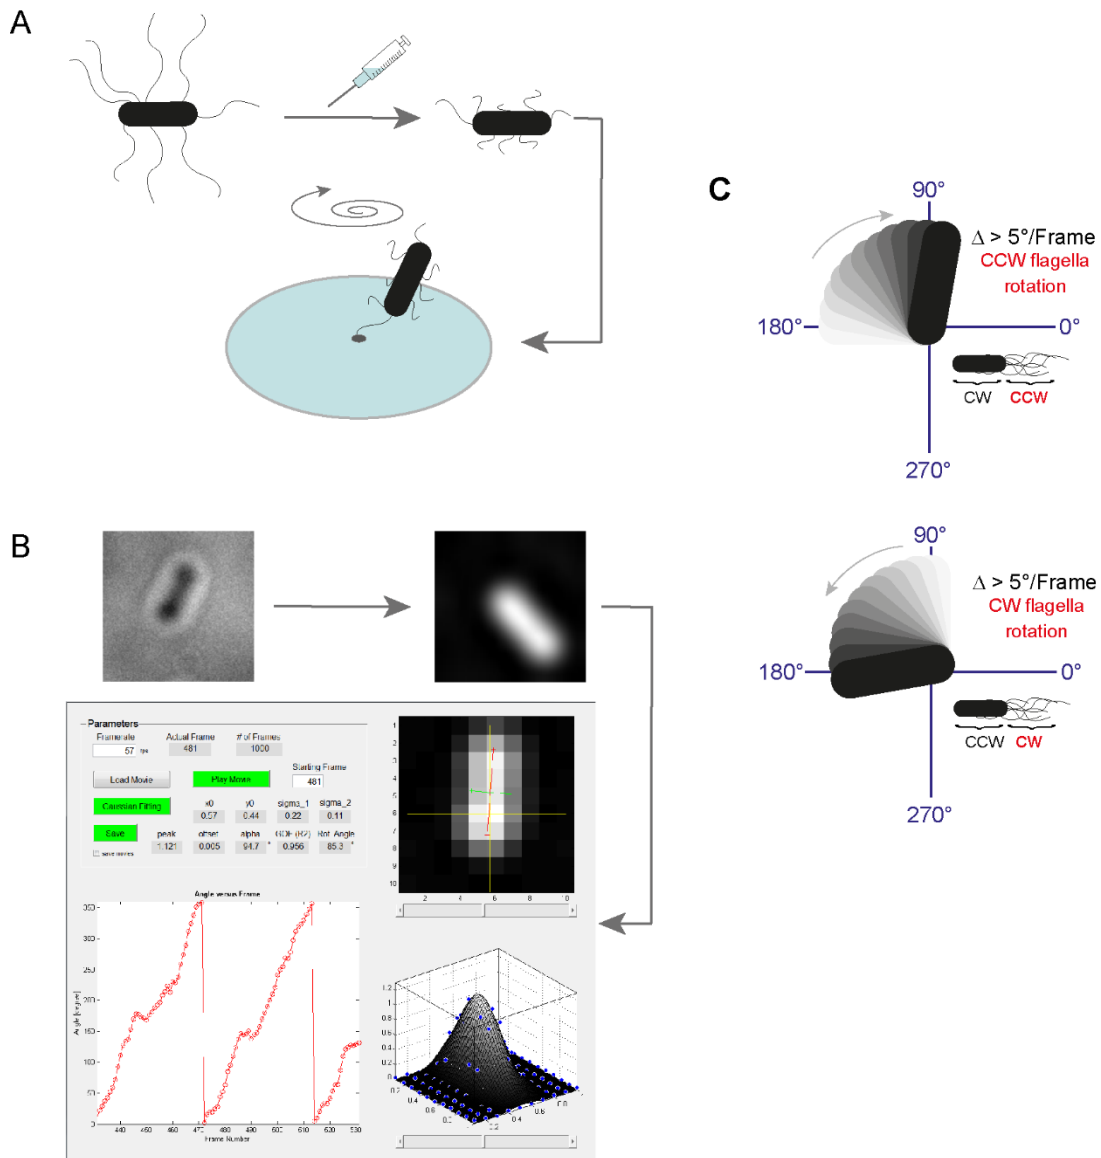

872

873

874 **Fig. S 5. Method of flagella rotation analysis.** Bacteria were cultured for 18.5 h in LB and  
 875 diluted 1:100 in PBS. A) Bacteria were subjected to shearing to remove and shorten flagellar  
 876 filaments. A small volume was given on an object slide and covered with a polystyrene-coated  
 877 coverslip. Distance between object slide and coverslip was achieved by drops of vacuum grease.  
 878 Dehydration or undertow were avoided by sealing the coverslip with *valap* (1:1:1 mixture of  
 879 vaselin, lanolin and paraffin). Bacteria fixed with only one flagellum to the coverslip showed  
 880 rotation of the body, which was recorded using the Axio Observer microscope with an  
 881 AxioCam CCD camera (Zeiss) for periods of 17.54 s (frame rate: 57 frames/s). B) Videos of

24.09.2019

*Salmonella* patho-metabolism

882 rotating bacteria were processed using ImageJ and rotation analyses were performed using the  
883 tool SpinningBug Tracker. By detection of the angle between the rotating bacteria and a  
884 reference axis, the rotation direction was calculated. C) If there was a change of degree of more  
885 than 5° it was defined as rotation. The visible clockwise rotation of the bacterial body results  
886 from counterclockwise rotation of a flagellum, and *vice versa*.
